# Supplementary material for: A palladium-catalyzed enantioselective hydroesterification of alkenylphenols with phenyl formate. A facile approach to optically active dihydrocoumarins
Source: Royal Society of Chemistry journal article supplement (doi:10.1039/c5ob01431j), 2015-01-01

**A Palladium-Catalyzed Enantioselective Hydroesterification of  
Alkenylphenols with Phenyl Formate. A Facile Approach to Optically  
Active Dihydrocoumarins\*\***

**Jingfu Li,<sup>a</sup> Wenju Chang,<sup>a</sup> Wenlong Ren,<sup>a</sup> Wei Liu,<sup>a</sup> Haining Wang,<sup>a</sup> and Yian Shi\*<sup>a,b,c</sup>**

*<sup>a</sup>State Key Laboratory of Coordination Chemistry, Collaborative Innovation Center of Chemistry for Life Sciences, Center for Multimolecular Organic Chemistry, School of Chemistry and Chemical Engineering, Nanjing University, Nanjing 210093 (China); <sup>b</sup>Beijing National Laboratory for Molecular Sciences, CAS Key Laboratory of Molecular Recognition and Function, Institute of Chemistry, Chinese Academy of Sciences, Beijing 100190 (China); <sup>c</sup>Department of Chemistry, Colorado State University, Fort Collins, Colorado 80523 (USA).*

**Supporting Information**

**Table of Contents**

|                                                    |      |
|----------------------------------------------------|------|
| Experimental procedures and characterization data  | S-2  |
| X-ray structure of <b>2I</b>                       | S-12 |
| HPLC data for determination of enantiomeric excess | S-22 |
| NMR spectra                                        | S-30 |

**General Methods.** All commercially available reagents were used without further purification. Solvents were purified with solvent purification systems. Column chromatography was performed on silica gel (200-300 mesh). <sup>1</sup>H NMR spectra were recorded on a 400 MHz NMR spectrometer and <sup>13</sup>C NMR spectra were recorded on a 100 MHz NMR spectrometer. IR spectra were recorded on a FT-IR spectrometer. Melting points were uncorrected. All ligands were purchased from commercial suppliers. Olefins **1a-d**, **f**, **g** were prepared according to the reported procedures.<sup>1</sup> Olefin **1e** was prepared from 5'-bromo-2'-hydroxyacetophenone via Suzuki coupling,<sup>2</sup> and Wittig olefination.<sup>1</sup> Olefins **1h-m** were prepared from 2'-hydroxy-5'-methylacetophenone via bromination,<sup>3</sup> Suzuki coupling,<sup>2</sup> and Wittig olefination.<sup>1</sup> Olefins **1n-p** were prepared from 2'-hydroxyacetophenone via dibromination,<sup>3</sup> Suzuki coupling,<sup>2</sup> and Wittig olefination.<sup>1</sup> Phenyl formate and formate **3a** were prepared from the corresponding phenols according to the reported procedures.<sup>4</sup>

- 1) Konishi, H.; Ueda, T.; Muto, T.; Manabe, K. *Org. Lett.* **2012**, *14*, 4722.
- 2) Bartoszek, M.; Beller, M.; Deutsch, J.; Klawonn, M.; Köckritz, A.; Nemati, N.; Pews-Davtyan, A. *Tetrahedron* **2008**, *64*, 1316.
- 3) Tillu, V. H.; Shinde, P. D.; Bedekar, A. V.; Wakharkar, R. D. *Synth. Commun.* **2003**, *33*, 1399.
- 4) Katafuchi, Y.; Fujihara, T.; Iwai, T.; Terao, J.; Tsuji, Y. *Adv. Synth. Catal.* **2011**, *353*, 475.

**Representative procedure for hydroesterification (Table 2, 2j).** A mixture of Pd(OAc)<sub>2</sub> (0.0056 g, 0.025 mmol), (*R*)-(-)-DTBM-SEGPHOS (0.059 g, 0.050 mmol), and THF (0.50 mL) in a vial (4.0 mL) was sonicated for 30 seconds. To the resulting solution were added olefin **1j** (0.1262 g, 0.50 mmol), phenyl formate (0.0733 g, 0.60 mmol), and HCOOH (0.023 g, 0.50 mmol) successively via syringe. After the vial was sealed with a septum cap, the reaction mixture was stirred at 55 °C for 24 h and purified by flash chromatography (silica gel, eluent: petroleum ether/ethyl acetate = 50/1) to give lactone **2j** as a white solid (0.1276 g, 91% yield, 91% ee).

**Table 2, 2a**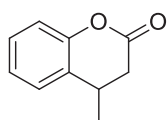

Colorless oil;  $[\alpha]_{20}^D = -16.8$  ( $c$  1.00,  $\text{CHCl}_3$ ) (76% ee); IR (film) 1767, 1486  $\text{cm}^{-1}$ ;  $^1\text{H}$  NMR (400 MHz,  $\text{CDCl}_3$ )  $\delta$  7.29-7.21 (m, 2H), 7.13 (td,  $J = 7.5, 1.2$  Hz, 1H), 7.06 (dd,  $J = 8.1, 1.2$  Hz, 1H), 3.24-3.13 (m, 1H), 2.84 (dd,  $J = 15.8, 5.5$  Hz, 1H), 2.59 (dd,  $J = 15.8, 7.2$  Hz, 1H), 1.34 (d,  $J = 7.0$  Hz, 3H);  $^{13}\text{C}$  NMR (100 MHz,  $\text{CDCl}_3$ )  $\delta$  168.5, 151.4, 128.4, 128.0, 126.7, 124.8, 117.1, 37.0, 29.6, 20.1.

Wang, H.; Dong, B.; Wang, Y.; Li, J.; Shi, Y. *Org. Lett.* **2014**, *16*, 186.

**Table 2, 2b**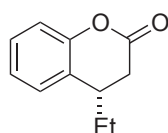

Light yellow oil;  $[\alpha]_{20}^D = -28.2$  ( $c$  1.00,  $\text{CHCl}_3$ ) (62% ee); [lit.<sup>1</sup> for (R)-**2b**;  $[\alpha]_{20}^D = +53.6$  ( $c$  1.0,  $\text{CHCl}_3$ ) (95% ee)]; IR (film) 1771, 1487  $\text{cm}^{-1}$ ;  $^1\text{H}$  NMR (400 MHz,  $\text{CDCl}_3$ )  $\delta$  7.26 (td,  $J = 7.7, 1.6$  Hz, 1H), 7.19 (dd,  $J = 7.4, 1.2$  Hz, 1H), 7.11 (t,  $J = 7.3$  Hz, 1H), 7.06 (d,  $J = 8.1$  Hz, 1H), 2.95-2.87 (m, 1H), 2.84 (dd,  $J = 15.7, 5.6$  Hz, 1H), 2.76 (dd,  $J = 15.7, 4.0$  Hz, 1H), 1.73-1.54 (m, 2H), 0.96 (t,  $J = 7.4$  Hz, 3H);  $^{13}\text{C}$  NMR (100 MHz,  $\text{CDCl}_3$ )  $\delta$  168.8, 151.5, 128.5, 128.1, 126.7, 124.5, 117.3, 36.8, 34.6, 27.8, 11.4; HRMS (ESI) Calcd for  $\text{C}_{11}\text{H}_{13}\text{O}_2$  (M+H): 177.0910; Found: 177.0911.

1) Teichert, J. F.; Feringa, B. L. *Chem. Commun.* **2011**, *47*, 2679.

**Table 2, 2c**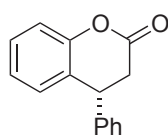

White solid; mp. 80-81  $^{\circ}\text{C}$ ;  $[\alpha]_{20}^D = -12.6$  ( $c$  0.70,  $\text{CHCl}_3$ ) (56% ee); [lit.<sup>1</sup> for (R)-**2c**;  $[\alpha]_{20}^D$

= -45.1 (*c* 0.98, CHCl<sub>3</sub>) (>99% ee)]; IR (film) 1762, 1486 cm<sup>-1</sup>; <sup>1</sup>H NMR (400 MHz, CDCl<sub>3</sub>) δ 7.39-7.27 (m, 4H), 7.19-7.12 (m, 3H), 7.09 (t, *J* = 7.5 Hz, 1H), 6.98 (d, *J* = 7.5 Hz, 1H), 4.35 (t, *J* = 7.0 Hz, 1H), 3.09 (dd, *J* = 15.9, 6.1 Hz, 1H), 3.03 (dd, *J* = 15.9, 7.8 Hz, 1H); <sup>13</sup>C NMR (100 MHz, CDCl<sub>3</sub>) δ 167.9, 151.9, 140.5, 129.3, 129.0, 128.5, 127.9, 127.8, 126.0, 124.9, 117.3, 40.9, 37.2; HRMS (ESI) Calcd for C<sub>15</sub>H<sub>12</sub>NaO<sub>2</sub> (M+Na): 247.0730; Found: 247.0735.

1) Chen, G.; Tokunaga, N.; Hayashi, T. *Org. Lett.* **2005**, *7*, 2285.

### Table 2, 2d

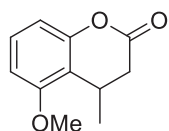

White solid; mp. 97-99 °C; [ $\alpha$ ]<sub>20</sub><sup>D</sup> = -16.4 (*c* 0.95, CHCl<sub>3</sub>) (73% ee); IR (film) 1760, 1462 cm<sup>-1</sup>; <sup>1</sup>H NMR (400 MHz, CDCl<sub>3</sub>) δ 7.19 (t, *J* = 8.2 Hz, 1H), 6.68 (d, *J* = 8.4 Hz, 1H), 6.66 (d, *J* = 8.5 Hz, 1H), 3.86 (s, 3H), 3.55-3.45 (m, 1H), 2.76 (dd, *J* = 15.8, 6.0 Hz, 1H), 2.70 (dd, *J* = 15.8, 2.3 Hz, 1H), 1.20 (d, *J* = 7.2 Hz, 3H); <sup>13</sup>C NMR (100 MHz, CDCl<sub>3</sub>) δ 168.6, 156.6, 152.1, 128.5, 116.6, 109.8, 106.5, 56.0, 36.4, 24.7, 19.8; HRMS (ESI) Calcd for C<sub>11</sub>H<sub>13</sub>O<sub>3</sub> (M+H): 193.0859; Found: 193.0859.

Dong, C.; Alper, H. *J. Org. Chem.* **2004**, *69*, 5011.

### Table 2, 2e

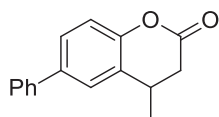

White solid; mp. 65-67 °C; [ $\alpha$ ]<sub>20</sub><sup>D</sup> = 8.7 (*c* 0.92, CHCl<sub>3</sub>) (73% ee); IR (film) 1764, 1481 cm<sup>-1</sup>; <sup>1</sup>H NMR (400 MHz, CDCl<sub>3</sub>) δ 7.59-7.53 (m, 2H), 7.50-7.42 (m, 4H), 7.39-7.33 (m, 1H), 7.13 (d, *J* = 8.4 Hz, 1H), 3.30-3.20 (m, 1H), 2.89 (dd, *J* = 15.8, 5.5 Hz, 1H), 2.63 (dd, *J* = 15.8, 7.1 Hz, 1H), 1.40 (d, *J* = 7.0 Hz, 3H); <sup>13</sup>C NMR (100 MHz, CDCl<sub>3</sub>) δ 168.5, 150.9, 140.5, 138.1, 129.1, 128.4, 127.6, 127.2, 125.5, 117.6, 37.0, 29.9, 20.2; HRMS (ESI) Calcd for C<sub>16</sub>H<sub>15</sub>O<sub>2</sub>

(M+H): 239.1067; Found: 239.1063.

**Table 2, 2f**

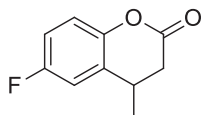

White solid; mp. 70-71 °C;  $[\alpha]_{20}^D = -13.6$  (*c* 1.25, CHCl<sub>3</sub>) (73% ee); IR (film) 1770, 1492 cm<sup>-1</sup>; <sup>1</sup>H NMR (400 MHz, CDCl<sub>3</sub>) δ 7.05-6.99 (m, 1H), 6.99-6.91 (m, 2H), 3.22-3.11 (m, 1H), 2.84 (dd, *J* = 15.9, 5.4 Hz, 1H), 2.56 (dd, *J* = 15.9, 7.7 Hz, 1H), 1.34 (d, *J* = 7.0 Hz, 3H); <sup>13</sup>C NMR (100 MHz, CDCl<sub>3</sub>) δ 168.1, 159.4 (d, *J* = 242 Hz), 147.4 (d, *J* = 2 Hz), 129.8 (d, *J* = 7 Hz), 118.4 (d, *J* = 8 Hz), 115.0 (d, *J* = 24 Hz), 113.4 (d, *J* = 24 Hz), 36.6, 29.7, 19.7; HRMS (ESI) Calcd for C<sub>10</sub>H<sub>10</sub>O<sub>2</sub>F (M+H): 181.0659; Found: 181.0654.

**Table 2, 2g**

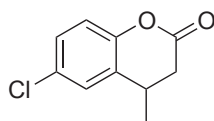

White solid; mp. 57-59 °C;  $[\alpha]_{20}^D = -2.9$  (*c* 1.09, CHCl<sub>3</sub>) (75% ee); IR (film) 1773, 1482 cm<sup>-1</sup>; <sup>1</sup>H NMR (400 MHz, CDCl<sub>3</sub>) δ 7.25-7.18 (m, 2H), 6.99 (d, *J* = 9.1 Hz, 1H), 3.21-3.09 (m, 1H), 2.83 (dd, *J* = 15.9, 5.5 Hz, 1H), 2.57 (dd, *J* = 15.9, 7.4 Hz, 1H), 1.33 (d, *J* = 7.0 Hz, 3H); <sup>13</sup>C NMR (100 MHz, CDCl<sub>3</sub>) δ 167.8, 150.0, 129.9, 129.7, 128.5, 126.7, 118.5, 36.6, 29.6, 19.8.

Wang, H.; Dong, B.; Li, J.; Shi, Y. *Org. Lett.* **2014**, *16*, 186.

**Table 2, 2h**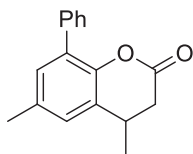

Colorless oil;  $[\alpha]_{20}^D = -21.2$  (*c* 0.50,  $\text{CHCl}_3$ ) (90% ee); IR (film) 1769, 1468  $\text{cm}^{-1}$ ;  $^1\text{H}$  NMR (400 MHz,  $\text{CDCl}_3$ )  $\delta$  7.53-7.48 (m, 2H), 7.46-7.39 (m, 2H), 7.38-7.31 (m, 1H), 7.12 (d, *J* = 1.8 Hz, 1H), 7.02 (d, *J* = 1.6 Hz, 1H), 3.25-3.13 (m, 1H), 2.84 (dd, *J* = 15.7, 5.4 Hz, 1H), 2.60 (dd, *J* = 15.7, 6.7 Hz, 1H), 2.38 (s, 3H), 1.37 (d, *J* = 7.0 Hz, 3H);  $^{13}\text{C}$  NMR (100 MHz,  $\text{CDCl}_3$ )  $\delta$  168.5, 146.1, 136.9, 134.2, 130.6, 130.4, 129.7, 128.5, 128.4, 127.7, 126.5, 37.0, 30.2, 21.0, 20.3; HRMS (ESI) Calcd for  $\text{C}_{17}\text{H}_{16}\text{NaO}_2$  (*M*+*Na*): 275.1043; Found: 275.1043.

**Table 2, 2i**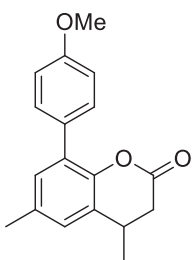

White solid; mp. 100-101  $^{\circ}\text{C}$ ;  $[\alpha]_{20}^D = -22.2$  (*c* 1.00,  $\text{CHCl}_3$ ) (89% ee); IR (film) 1770, 1511  $\text{cm}^{-1}$ ;  $^1\text{H}$  NMR (400 MHz,  $\text{CDCl}_3$ )  $\delta$  7.49-7.42 (m, 2H), 7.10 (d, *J* = 1.7 Hz, 1H), 7.00-6.93 (m, 3H), 3.84 (s, 3H), 3.23-3.11 (m, 1H), 2.83 (dd, *J* = 15.7, 5.4 Hz, 1H), 2.59 (dd, *J* = 15.7, 6.7 Hz, 1H), 2.37 (s, 3H), 1.36 (d, *J* = 7.0 Hz, 3H);  $^{13}\text{C}$  NMR (100 MHz,  $\text{CDCl}_3$ )  $\delta$  168.6, 159.3, 146.0, 134.2, 130.8, 130.3, 129.9, 129.2, 128.5, 126.0, 113.9, 55.5, 37.0, 30.2, 21.0, 20.3; HRMS (ESI) Calcd for  $\text{C}_{18}\text{H}_{18}\text{NaO}_3$  (*M*+*Na*): 305.1148; Found: 305.1148.

**Table 2, 2j**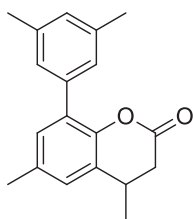

White solid; mp. 120-121 °C;  $[\alpha]_{20}^D = -24.8$  (*c* 0.50, CHCl<sub>3</sub>) (91% ee); IR (film) 1770, 1468 cm<sup>-1</sup>; <sup>1</sup>H NMR (400 MHz, CDCl<sub>3</sub>) δ 7.10 (s, 3H), 7.00 (s, 2H), 3.23-3.13 (m, 1H), 2.83 (dd, *J* = 15.6, 5.4 Hz, 1H), 2.59 (dd, *J* = 15.6, 6.7 Hz, 1H), 2.37 (s, 9H), 1.36 (d, *J* = 7.0 Hz, 3H); <sup>13</sup>C NMR (100 MHz, CDCl<sub>3</sub>) δ 168.5, 146.1, 137.8, 136.8, 134.0, 130.7, 130.6, 129.4, 128.4, 127.5, 126.2, 37.0, 30.2, 21.6, 21.0, 20.3; HRMS (ESI) Calcd for C<sub>19</sub>H<sub>21</sub>O<sub>2</sub> (M+H): 281.1536; Found: 281.1538.

**Table 2, 2k**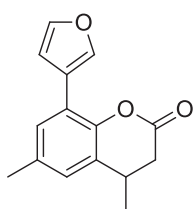

Light yellow solid; mp. 88-89 °C;  $[\alpha]_{20}^D = -25.6$  (*c* 0.50, CHCl<sub>3</sub>) (86% ee); IR (film) 1767, 1460 cm<sup>-1</sup>; <sup>1</sup>H NMR (400 MHz, CDCl<sub>3</sub>) δ 8.08 (s, 1H), 7.48 (t, *J* = 1.7 Hz, 1H), 7.24 (d, *J* = 1.8 Hz, 1H), 6.92 (d, *J* = 1.8 Hz, 1H), 6.80 (d, *J* = 1.1 Hz, 1H), 3.22-3.10 (m, 1H), 2.84 (dd, *J* = 15.7, 5.4 Hz, 1H), 2.61 (dd, *J* = 15.7, 6.6 Hz, 1H), 2.36 (s, 3H), 1.35 (d, *J* = 7.0 Hz, 3H); <sup>13</sup>C NMR (100 MHz, CDCl<sub>3</sub>) δ 168.2, 146.0, 142.8, 142.2, 134.1, 128.5, 127.4, 125.6, 120.8, 120.6, 109.6, 36.7, 30.0, 21.0, 20.1; HRMS (ESI) Calcd for C<sub>15</sub>H<sub>15</sub>O<sub>3</sub> (M+H): 243.1016; Found: 243.1016.

**Table 2, 2l**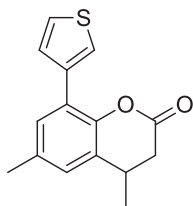

White solid; mp. 106-107 °C;  $[\alpha]_{20}^D = -26.4$  (*c* 0.50, CHCl<sub>3</sub>) (88% ee); IR (film) 3103, 1762, 1445 cm<sup>-1</sup>; <sup>1</sup>H NMR (400 MHz, CDCl<sub>3</sub>) δ 7.65 (dd, *J* = 3.0, 1.3 Hz, 1H), 7.44 (dd, *J* = 5.0, 1.3 Hz, 1H), 7.36 (dd, *J* = 5.0, 3.0 Hz, 1H), 7.29-7.24 (m, 1H), 6.97 (d, *J* = 1.9 Hz, 1H), 3.24-3.11 (m, 1H), 2.84 (dd, *J* = 15.7, 5.4 Hz, 1H), 2.61 (dd, *J* = 15.7, 6.6 Hz, 1H), 2.37 (s, 3H), 1.35 (d, *J* = 7.0 Hz, 3H); <sup>13</sup>C NMR (100 MHz, CDCl<sub>3</sub>) δ 168.4, 146.0, 136.6, 134.2, 129.2, 128.7, 128.5, 126.2, 125.2, 124.6, 124.3, 36.8, 30.1, 21.0, 20.2; HRMS (ESI) Calcd for C<sub>15</sub>H<sub>15</sub>O<sub>2</sub>S (M+H): 259.0787; Found: 259.0789.

**Table 2, 2m**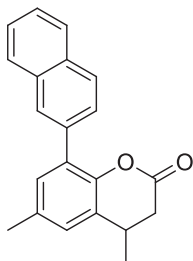

White solid; mp. 59-61 °C;  $[\alpha]_{20}^D = -21.6$  (*c* 1.00, CHCl<sub>3</sub>) (87% ee); IR (film) 1767, 1457 cm<sup>-1</sup>; <sup>1</sup>H NMR (400 MHz, CDCl<sub>3</sub>) δ 7.95 (d, *J* = 1.0 Hz, 1H), 7.92-7.83 (m, 3H), 7.66 (dd, *J* = 8.5, 1.7 Hz, 1H), 7.53-7.46 (m, 2H), 7.23 (d, *J* = 1.9 Hz, 1H), 7.06 (d, *J* = 1.9 Hz, 1H), 3.27-3.16 (m, 1H), 2.87 (dd, *J* = 15.7, 5.4 Hz, 1H), 2.63 (dd, *J* = 15.7, 6.7 Hz, 1H), 2.41 (s, 3H), 1.39 (d, *J* = 7.0 Hz, 3H); <sup>13</sup>C NMR (100 MHz, CDCl<sub>3</sub>) δ 168.4, 146.4, 134.6, 134.3, 133.6, 132.9, 130.8, 130.4, 128.6, 128.5, 127.9, 127.84, 127.81, 126.6, 126.30, 126.27, 37.0, 30.3, 21.1, 20.3; HRMS (ESI) Calcd for C<sub>21</sub>H<sub>19</sub>O<sub>2</sub> (M+H): 303.1380; Found: 303.1384.



**Table 2, 2n**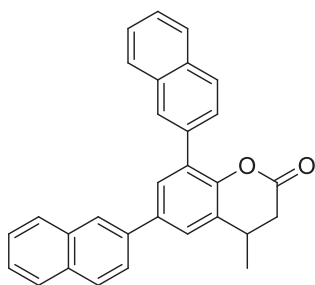

White solid; mp. 161-163 °C;  $[\alpha]_{20}^D = 3.4$  (*c* 1.00, CHCl<sub>3</sub>) (89% ee); IR (film) 1770, 1448 cm<sup>-1</sup>; <sup>1</sup>H NMR (400 MHz, CDCl<sub>3</sub>) δ 8.08 (s, 1H), 8.05 (s, 1H), 7.97-7.86 (m, 6H), 7.81-7.73 (m, 3H), 7.60 (d, *J* = 2.1 Hz, 1H), 7.56-7.48 (m, 4H), 3.42-3.31 (m, 1H), 2.96 (dd, *J* = 15.7, 5.4 Hz, 1H), 2.72 (dd, *J* = 15.7, 6.6 Hz, 1H), 1.49 (d, *J* = 7.0 Hz, 3H); <sup>13</sup>C NMR (100 MHz, CDCl<sub>3</sub>) δ 168.1, 148.0, 137.9, 137.6, 134.4, 133.9, 133.6, 133.0, 132.9, 131.2, 129.33, 129.31, 128.9, 128.8, 128.5, 128.4, 128.0, 127.9, 127.87, 127.84, 126.7, 126.5, 126.4, 126.37, 125.9, 125.5, 125.0, 37.0, 30.5, 20.5; HRMS (ESI) Calcd for C<sub>30</sub>H<sub>23</sub>O<sub>2</sub> (M+H): 415.1693; Found: 415.1696.

**Table 2, 2o**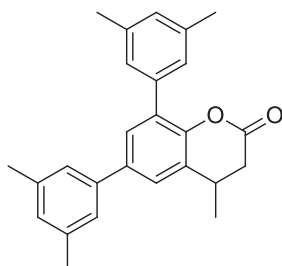

White solid; mp. 67-69 °C;  $[\alpha]_{20}^D = 5.2$  (*c* 0.50, CHCl<sub>3</sub>) (91% ee); IR (film) 1771, 1456 cm<sup>-1</sup>; <sup>1</sup>H NMR (400 MHz, CDCl<sub>3</sub>) δ 7.50 (d, *J* = 2.2 Hz, 1H), 7.40 (d, *J* = 2.0 Hz, 1H), 7.22 (s, 2H), 7.17 (s, 2H), 7.02 (s, 2H), 3.34-3.24 (m, 1H), 2.90 (dd, *J* = 15.6, 5.4 Hz, 1H), 2.66 (dd, *J* = 15.7, 6.6 Hz, 1H), 2.40 (s, 6H), 2.39 (s, 6H), 1.44 (d, *J* = 7.0 Hz, 3H); <sup>13</sup>C NMR (100 MHz, CDCl<sub>3</sub>) δ 168.2, 147.6, 140.4, 138.6, 138.0, 137.9, 136.8, 131.3, 129.6, 129.3, 128.9, 127.6, 125.1, 124.4, 37.0, 30.5, 21.6, 21.59, 20.4; HRMS (ESI) Calcd for C<sub>26</sub>H<sub>27</sub>O<sub>2</sub> (M+H): 371.2006; Found: 371.2008.

**Table 2, 2p**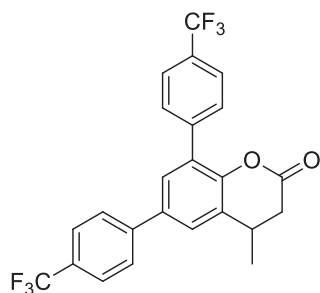

White solid; mp. 88-90 °C;  $[\alpha]_{20}^D = 4.6$  ( $c$  1.00,  $\text{CHCl}_3$ ) (71% ee); IR (film) 1779, 1465  $\text{cm}^{-1}$ ;  $^1\text{H}$  NMR (400 MHz,  $\text{CDCl}_3$ )  $\delta$  7.76-7.64 (m, 8 H), 7.52 (d,  $J = 2.2$  Hz, 1H), 7.49 (d,  $J = 2.0$  Hz, 1H), 3.40-3.28 (m, 1 H), 2.93 (dd,  $J = 15.8, 5.4$  Hz, 1 H), 2.70 (dd,  $J = 15.8, 6.7$  Hz, 1 H), 1.46 (d,  $J = 7.0$  Hz, 3H);  $^{13}\text{C}$  NMR (100 MHz,  $\text{CDCl}_3$ )  $\delta$  167.5, 148.2, 143.5, 140.2, 136.6, 130.1, 129.9 (q,  $J = 32$  Hz), 129.8 (q,  $J = 32$  Hz), 129.7, 128.6, 127.5, 126.0 (q,  $J = 3$  Hz), 125.6, 125.4 (q,  $J = 3$  Hz), 124.4 (q,  $J = 270$  Hz), 124.35 (q,  $J = 270$  Hz), 36.5, 30.3, 20.1; HRMS (ESI) Calcd for  $\text{C}_{24}\text{H}_{16}\text{F}_6\text{NaO}_2$  ( $\text{M}+\text{Na}$ ): 473.0947; Found: 473.0947.

**Procedures for Schemes 2-4**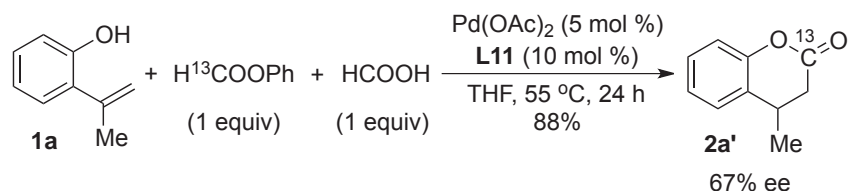**Scheme 2**

A mixture of  $\text{Pd}(\text{OAc})_2$  (0.0056 g, 0.025 mmol), (*R*)-(-)-DTBM-SEGPHOS (0.059 g, 0.050 mmol), and THF (0.50 mL) in a vial (4.0 mL) was sonicated for 30 seconds. To the resulting solution were added olefin **1a** (0.0671 g, 0.50 mmol),  $\text{H}^{13}\text{COOPh}$  (0.0616 g, 0.50 mmol), and  $\text{HCOOH}$  (0.023 g, 0.50 mmol) successively via syringe. After the vial was sealed with a septum cap, the reaction mixture was stirred at 55 °C for 24 h and purified by flash chromatography (silica gel, eluent: petroleum ether/ethyl acetate = 50/1) to give lactone **2a'** as a colorless oil (0.0718 g, 88% yield, 67% ee).  $[\alpha]_{20}^D = -15.8$  ( $c$  1.00,  $\text{CHCl}_3$ ); IR (film) 1725, 1487, 1216  $\text{cm}^{-1}$ ;  $^1\text{H}$  NMR (400 MHz,  $\text{CDCl}_3$ )  $\delta$  7.29-7.21 (m, 2H), 7.13 (td,  $J = 7.5, 1.2$  Hz, 1H), 7.06 (dd,  $J = 8.1, 1.0$  Hz, 1H), 3.25-3.12 (m, 1H), 2.85 (ddd,  $J = 15.8, 6.8, 5.5$

Hz, 1H), 2.59 (ddd,  $J = 15.8, 7.1, 6.4$  Hz, 1H), 1.35 (d,  $J = 7.0$  Hz, 3H);  $^{13}\text{C}$  NMR (100 MHz,  $\text{CDCl}_3$ )  $\delta$  168.5, 151.4 (d,  $J = 1.0$  Hz), 128.4, 128.0 (d,  $J = 4.0$  Hz), 126.7, 124.8, 117.1 (d,  $J = 2.0$  Hz), 37.0 (d,  $J = 53.0$  Hz), 29.6 (d,  $J = 3.0$  Hz), 20.1 (d,  $J = 3.0$  Hz); HRMS (ESI) Calcd for  $\text{C}_9^{13}\text{CH}_{11}\text{O}_2$  (M+H): 164.0787; Found: 164.0788.

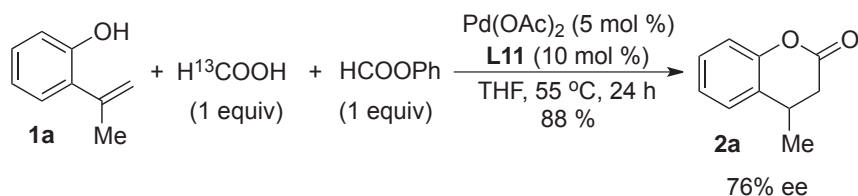

### Scheme 3

A mixture of  $\text{Pd}(\text{OAc})_2$  (0.0056 g, 0.025 mmol), (*R*)-(-)-DTBM-SEGPHOS (0.059 g, 0.050 mmol), and THF (0.50 mL) in a vial (4.0 mL) was sonicated for 30 seconds. To the resulting solution were added olefin **1a** (0.0671 g, 0.50 mmol),  $\text{HCOOPh}$  (0.0611 g, 0.50 mmol), and  $\text{H}^{13}\text{COOH}$  (0.0235 g, 0.50 mmol) successively via syringe. After the vial was sealed with a septum cap, the reaction mixture was stirred at 55 °C for 24 h and purified by flash chromatography (silica gel, eluent: petroleum ether/ethyl acetate = 50/1) to give lactone **2a** as a colorless oil (0.0714 g, 88% yield, 76% ee).

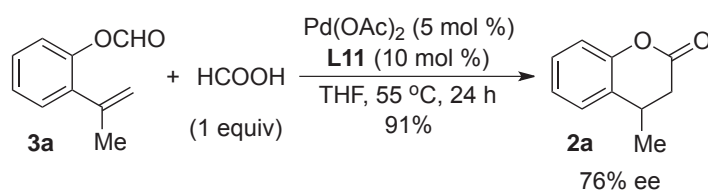

### Scheme 4

A mixture of  $\text{Pd}(\text{OAc})_2$  (0.0056 g, 0.025 mmol), (*R*)-(-)-DTBM-SEGPHOS (0.059 g, 0.050 mmol), and THF (0.50 mL) in a vial (4.0 mL) was sonicated for 30 seconds. To the resulting solution were added olefin **3a** (0.0811 g, 0.50 mmol) and  $\text{HCOOH}$  (0.023 g, 0.50 mmol) successively via syringe. After the vial was sealed with a septum cap, the reaction mixture was stirred at 55 °C for 24 h and purified by flash chromatography (silica gel, eluent: petroleum ether/ethyl acetate = 50/1) to give lactone **2a** as a colorless oil (0.0738 g, 91% yield, 76% ee).

The X-ray structure of compound **21**

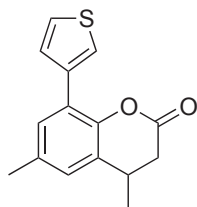

**21**

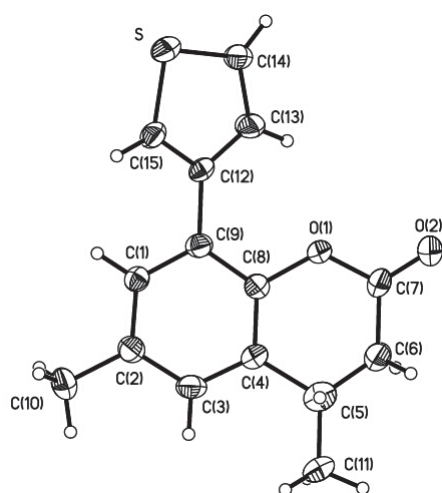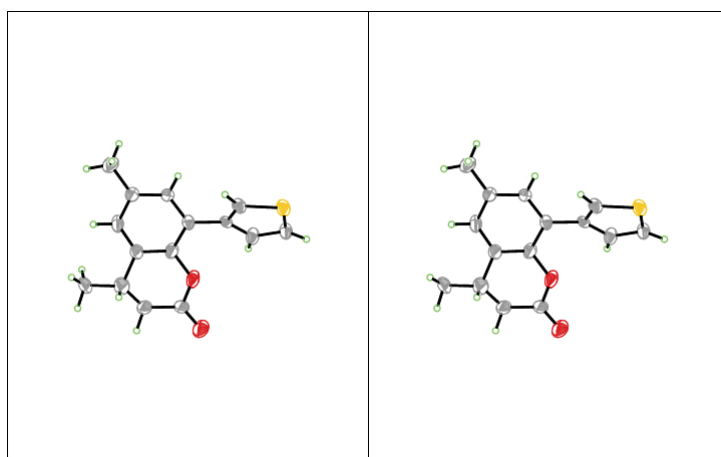

Table S1 - Crystal Data and Details of the Structure Determination for: **21**

|                                   |                                                                                                                        |
|-----------------------------------|------------------------------------------------------------------------------------------------------------------------|
| Identification code               | <b>21</b>                                                                                                              |
| Empirical formula                 | C <sub>15</sub> H <sub>14</sub> O <sub>2</sub> S                                                                       |
| Formula weight                    | 258.32                                                                                                                 |
| Temperature                       | 293(2) K                                                                                                               |
| Wavelength                        | 0.71073 Å                                                                                                              |
| Crystal system, space group       | Monoclinic, P21/C                                                                                                      |
| Unit cell dimensions              | a = 8.1040(16) Å    alpha = 90 deg.<br>b = 17.252(4) Å    beta = 106.24(3) deg.<br>c = 9.4860(19) Å    gamma = 90 deg. |
| Volume                            | 1273.3(4) Å <sup>3</sup>                                                                                               |
| Z, Calculated density             | 4, 1.348 Mg/m <sup>3</sup>                                                                                             |
| Absorption coefficient            | 0.244 mm <sup>-1</sup>                                                                                                 |
| F(000)                            | 544                                                                                                                    |
| Crystal size                      | 0.20 x 0.10 x 0.10 mm                                                                                                  |
| Theta range for data collection   | 2.36 to 25.43 deg.                                                                                                     |
| Limiting indices                  | -9<=h<=9, 0<=k<=20, 0<=l<=11                                                                                           |
| Reflections collected / unique    | 2339 / 2339 [R(int) = 0.0000]                                                                                          |
| Completeness to theta = 25.43     | 99.5 %                                                                                                                 |
| Absorption correction             | Psi-scan                                                                                                               |
| Max. and min. transmission        | 0.9760 and 0.9527                                                                                                      |
| Refinement method                 | Full-matrix least-squares on F <sup>2</sup>                                                                            |
| Data / restraints / parameters    | 2339 / 2 / 163                                                                                                         |
| Goodness-of-fit on F <sup>2</sup> | 1.091                                                                                                                  |
| Final R indices [I>2sigma(I)]     | R1 = 0.0987, wR2 = 0.2268                                                                                              |
| R indices (all data)              | R1 = 0.1371, wR2 = 0.2481                                                                                              |
| Largest diff. peak and hole       | 0.535 and -0.399 e.Å <sup>-3</sup>                                                                                     |

Table S2 - Atomic coordinates ( $\times 10^4$ ) and equivalent isotropic displacement parameters ( $\text{\AA}^2 \times 10^3$ ) for **2l**. U(eq) is defined as one third of the trace of the orthogonalized Uij tensor.

|       | x        | y       | z       | U(eq)  |
|-------|----------|---------|---------|--------|
| S     | 4050(2)  | 3204(1) | 9680(2) | 61(1)  |
| C(1)  | 1390(6)  | 3662(3) | 4765(5) | 41(1)  |
| O(1)  | 3457(8)  | 5472(2) | 6236(4) | 109(2) |
| C(2)  | 791(7)   | 3810(3) | 3269(5) | 50(1)  |
| O(2)  | 4456(9)  | 6634(3) | 6811(5) | 110(2) |
| C(3)  | 1140(8)  | 4535(3) | 2779(6) | 61(2)  |
| C(4)  | 1981(9)  | 5105(3) | 3724(6) | 67(2)  |
| C(5)  | 2558(13) | 5866(4) | 3204(7) | 104(3) |
| C(6)  | 3148(9)  | 6393(3) | 4337(6) | 71(2)  |
| C(7)  | 3744(8)  | 6193(3) | 5889(6) | 63(2)  |
| C(8)  | 2512(8)  | 4932(3) | 5207(6) | 62(2)  |
| C(9)  | 2197(7)  | 4222(3) | 5774(5) | 45(1)  |
| C(10) | -107(9)  | 3205(3) | 2216(7) | 72(2)  |
| C(11) | 1836(9)  | 6086(4) | 1685(6) | 71(2)  |
| C(12) | 2863(5)  | 4018(3) | 7371(5) | 37(1)  |
| C(13) | 2969(8)  | 4503(3) | 8563(6) | 59(2)  |
| C(14) | 3608(8)  | 4146(3) | 9929(6) | 56(1)  |
| C(15) | 3425(8)  | 3294(3) | 7816(6) | 52(1)  |

Table S3 - Bond lengths [Å] and angles [deg] for **2l**.

|                 |          |
|-----------------|----------|
| S-C(14)         | 1.694(6) |
| S-C(15)         | 1.705(5) |
| C(1)-C(9)       | 1.388(7) |
| C(1)-C(2)       | 1.389(7) |
| C(1)-H(1A)      | 0.93     |
| O(1)-C(7)       | 1.325(7) |
| O(1)-C(8)       | 1.410(7) |
| C(2)-C(3)       | 1.390(8) |
| C(2)-C(10)      | 1.487(7) |
| O(2)-C(7)       | 1.180(7) |
| C(3)-C(4)       | 1.376(8) |
| C(3)-H(3A)      | 0.93     |
| C(4)-C(8)       | 1.383(7) |
| C(4)-C(5)       | 1.522(8) |
| C(5)-C(6)       | 1.387(7) |
| C(5)-C(11)      | 1.446(8) |
| C(5)-H(5)       | 0.98     |
| C(6)-C(7)       | 1.457(8) |
| C(6)-H(6A)      | 0.97     |
| C(6)-H(6B)      | 0.97     |
| C(8)-C(9)       | 1.391(7) |
| C(9)-C(12)      | 1.501(6) |
| C(10)-H(10A)    | 0.96     |
| C(10)-H(10B)    | 0.96     |
| C(10)-H(10C)    | 0.96     |
| C(11)-H(11A)    | 0.96     |
| C(11)-H(11B)    | 0.96     |
| C(11)-H(11C)    | 0.96     |
| C(12)-C(15)     | 1.357(7) |
| C(12)-C(13)     | 1.390(7) |
| C(13)-C(14)     | 1.397(7) |
| C(13)-H(13A)    | 0.93     |
| C(14)-H(14A)    | 0.93     |
| C(15)-H(15B)    | 0.93     |
| C(14)-S-C(15)   | 92.5(2)  |
| C(9)-C(1)-C(2)  | 122.6(5) |
| C(9)-C(1)-H(1A) | 118.7    |
| C(2)-C(1)-H(1A) | 118.7    |
| C(7)-O(1)-C(8)  | 123.2(4) |
| C(3)-C(2)-C(1)  | 117.5(5) |
| C(3)-C(2)-C(10) | 120.9(5) |
| C(1)-C(2)-C(10) | 121.5(5) |
| C(4)-C(3)-C(2)  | 122.3(5) |
| C(4)-C(3)-H(3A) | 118.8    |

|                     |          |
|---------------------|----------|
| C(2)-C(3)-H(3A)     | 118.8    |
| C(3)-C(4)-C(8)      | 117.7(5) |
| C(3)-C(4)-C(5)      | 123.1(5) |
| C(8)-C(4)-C(5)      | 118.6(5) |
| C(6)-C(5)-C(11)     | 123.8(6) |
| C(6)-C(5)-C(4)      | 112.6(6) |
| C(11)-C(5)-C(4)     | 118.3(6) |
| C(6)-C(5)-H(5)      | 97.7     |
| C(11)-C(5)-H(5)     | 97.7     |
| C(4)-C(5)-H(5)      | 97.7     |
| C(5)-C(6)-C(7)      | 125.0(6) |
| C(5)-C(6)-H(6A)     | 106.1    |
| C(7)-C(6)-H(6A)     | 106.1    |
| C(5)-C(6)-H(6B)     | 106.1    |
| C(7)-C(6)-H(6B)     | 106.1    |
| H(6A)-C(6)-H(6B)    | 106.3    |
| O(2)-C(7)-O(1)      | 120.3(5) |
| O(2)-C(7)-C(6)      | 123.5(5) |
| O(1)-C(7)-C(6)      | 116.2(5) |
| C(4)-C(8)-C(9)      | 123.0(5) |
| C(4)-C(8)-O(1)      | 121.1(5) |
| C(9)-C(8)-O(1)      | 115.9(4) |
| C(8)-C(9)-C(1)      | 116.7(4) |
| C(8)-C(9)-C(12)     | 122.9(4) |
| C(1)-C(9)-C(12)     | 120.0(4) |
| C(2)-C(10)-H(10A)   | 109.5    |
| C(2)-C(10)-H(10B)   | 109.5    |
| H(10A)-C(10)-H(10B) | 109.5    |
| C(2)-C(10)-H(10C)   | 109.5    |
| H(10A)-C(10)-H(10C) | 109.5    |
| H(10B)-C(10)-H(10C) | 109.5    |
| C(5)-C(11)-H(11A)   | 109.5    |
| C(5)-C(11)-H(11B)   | 109.5    |
| H(11A)-C(11)-H(11B) | 109.5    |
| C(5)-C(11)-H(11C)   | 109.5    |
| H(11A)-C(11)-H(11C) | 109.5    |
| H(11B)-C(11)-H(11C) | 109.5    |
| C(15)-C(12)-C(13)   | 111.2(4) |
| C(15)-C(12)-C(9)    | 121.7(4) |
| C(13)-C(12)-C(9)    | 127.1(4) |
| C(12)-C(13)-C(14)   | 114.3(5) |
| C(12)-C(13)-H(13A)  | 122.9    |
| C(14)-C(13)-H(13A)  | 122.9    |
| C(13)-C(14)-S       | 109.4(4) |
| C(13)-C(14)-H(14A)  | 125.3    |
| S-C(14)-H(14A)      | 125.3    |



|                    |          |
|--------------------|----------|
| C(12)-C(15)-S      | 112.5(4) |
| C(12)-C(15)-H(15B) | 123.7    |
| S-C(15)-H(15B)     | 123.7    |

Symmetry transformations used to generate equivalent atoms:

Table S4 - Anisotropic displacement parameters ( $\text{\AA}^2 \times 10^3$ ) for **2I**. The anisotropic displacement factor exponent takes the form:  $-2 \pi^2 [ h^2 a^{*2} U_{11} + \dots + 2 h k a^* b^* U_{12} ]$

|       | U11    | U22   | U33   | U23    | U13    | U12    |
|-------|--------|-------|-------|--------|--------|--------|
| S     | 82(1)  | 50(1) | 49(1) | 14(1)  | 14(1)  | 5(1)   |
| C(1)  | 37(3)  | 39(3) | 44(3) | 4(2)   | 10(2)  | 2(2)   |
| O(1)  | 200(6) | 56(3) | 39(2) | 13(2)  | -15(3) | -54(3) |
| C(2)  | 53(3)  | 48(3) | 47(3) | -1(2)  | 10(2)  | 2(2)   |
| O(2)  | 182(6) | 59(3) | 62(3) | 4(2)   | -9(3)  | -48(3) |
| C(3)  | 88(4)  | 56(3) | 37(3) | 4(3)   | 15(3)  | 7(3)   |
| C(4)  | 97(5)  | 51(3) | 45(3) | 11(3)  | 5(3)   | -17(3) |
| C(5)  | 148(8) | 87(5) | 64(4) | 16(4)  | 10(5)  | -37(5) |
| C(6)  | 82(4)  | 57(4) | 60(4) | 13(3)  | -2(3)  | -21(3) |
| C(7)  | 77(4)  | 45(3) | 60(4) | 8(3)   | 8(3)   | -19(3) |
| C(8)  | 93(5)  | 40(3) | 42(3) | 2(2)   | 0(3)   | -5(3)  |
| C(9)  | 54(3)  | 43(3) | 39(3) | 4(2)   | 14(2)  | 7(2)   |
| C(10) | 95(5)  | 48(3) | 63(4) | -13(3) | 7(3)   | -8(3)  |
| C(11) | 101(5) | 63(4) | 53(3) | 18(3)  | 25(3)  | -9(4)  |
| C(12) | 29(2)  | 41(3) | 43(3) | 10(2)  | 14(2)  | 0(2)   |
| C(13) | 75(4)  | 49(3) | 43(3) | 7(2)   | 1(3)   | 13(3)  |
| C(14) | 77(4)  | 48(3) | 41(3) | 2(2)   | 15(3)  | 6(3)   |
| C(15) | 73(4)  | 36(3) | 50(3) | 6(2)   | 23(3)  | 4(3)   |

Table S5 - Hydrogen coordinates (  $\times 10^4$ ) and isotropic displacement parameters ( $\text{Å}^2 \times 10^3$ ) for **2I**.

|        | x     | y    | z     | U(eq) |
|--------|-------|------|-------|-------|
| H(1A)  | 1244  | 3168 | 5105  | 49    |
| H(3A)  | 792   | 4638 | 1777  | 73    |
| H(5)   | 3680  | 5691 | 3128  | 125   |
| H(6A)  | 2230  | 6767 | 4246  | 85    |
| H(6B)  | 4087  | 6670 | 4116  | 85    |
| H(10A) | -434  | 3416 | 1240  | 108   |
| H(10B) | -1116 | 3037 | 2472  | 108   |
| H(10C) | 647   | 2772 | 2256  | 108   |
| H(11A) | 2344  | 6564 | 1499  | 107   |
| H(11B) | 616   | 6152 | 1488  | 107   |
| H(11C) | 2067  | 5688 | 1060  | 107   |
| H(13A) | 2642  | 5021 | 8461  | 70    |
| H(14A) | 3766  | 4387 | 10834 | 67    |
| H(15B) | 3464  | 2891 | 7175  | 62    |

Table S6 - Torsion angles [deg] for **2l**.

|                         |           |
|-------------------------|-----------|
| C(9)-C(1)-C(2)-C(3)     | 4.7(8)    |
| C(9)-C(1)-C(2)-C(10)    | -178.5(5) |
| C(1)-C(2)-C(3)-C(4)     | -2.6(9)   |
| C(10)-C(2)-C(3)-C(4)    | -179.5(6) |
| C(2)-C(3)-C(4)-C(8)     | 1.1(10)   |
| C(2)-C(3)-C(4)-C(5)     | 172.7(7)  |
| C(3)-C(4)-C(5)-C(6)     | 171.1(7)  |
| C(8)-C(4)-C(5)-C(6)     | -17.3(12) |
| C(3)-C(4)-C(5)-C(11)    | 15.8(13)  |
| C(8)-C(4)-C(5)-C(11)    | -172.7(7) |
| C(11)-C(5)-C(6)-C(7)    | 174.4(7)  |
| C(4)-C(5)-C(6)-C(7)     | 20.7(13)  |
| C(8)-O(1)-C(7)-O(2)     | 175.5(7)  |
| C(8)-O(1)-C(7)-C(6)     | -5.0(11)  |
| C(5)-C(6)-C(7)-O(2)     | 169.2(9)  |
| C(5)-C(6)-C(7)-O(1)     | -10.3(12) |
| C(3)-C(4)-C(8)-C(9)     | -1.5(11)  |
| C(5)-C(4)-C(8)-C(9)     | -173.5(7) |
| C(3)-C(4)-C(8)-O(1)     | 176.8(7)  |
| C(5)-C(4)-C(8)-O(1)     | 4.8(11)   |
| C(7)-O(1)-C(8)-C(4)     | 7.1(12)   |
| C(7)-O(1)-C(8)-C(9)     | -174.4(6) |
| C(4)-C(8)-C(9)-C(1)     | 3.4(9)    |
| O(1)-C(8)-C(9)-C(1)     | -175.0(5) |
| C(4)-C(8)-C(9)-C(12)    | 176.2(6)  |
| O(1)-C(8)-C(9)-C(12)    | -2.2(9)   |
| C(2)-C(1)-C(9)-C(8)     | -5.1(8)   |
| C(2)-C(1)-C(9)-C(12)    | -178.1(4) |
| C(8)-C(9)-C(12)-C(15)   | -142.3(6) |
| C(1)-C(9)-C(12)-C(15)   | 30.2(7)   |
| C(8)-C(9)-C(12)-C(13)   | 39.1(8)   |
| C(1)-C(9)-C(12)-C(13)   | -148.4(5) |
| C(15)-C(12)-C(13)-C(14) | -0.3(7)   |
| C(9)-C(12)-C(13)-C(14)  | 178.4(5)  |
| C(12)-C(13)-C(14)-S     | -0.4(7)   |
| C(15)-S-C(14)-C(13)     | 0.7(5)    |
| C(13)-C(12)-C(15)-S     | 0.8(6)    |
| C(9)-C(12)-C(15)-S      | -178.0(4) |
| C(14)-S-C(15)-C(12)     | -0.9(5)   |

Symmetry transformations used to generate equivalent atoms:

Table S7 - Hydrogen bonds for **2I** [Å and deg.].

| D-H...A | d(D-H) | d(H...A) | d(D...A) | <(DHA) |
|---------|--------|----------|----------|--------|
|---------|--------|----------|----------|--------|

## The chromatograms for determination of enantioselectivity

Table 2, 2a

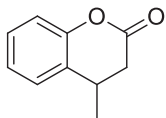

**HPLC Condition: Column:** Chiralpak OJ-H, Daicel Chemical Industries, Ltd.;  
**Eluent:** Hexanes/IPA (90/10); **Flow rate:** 1.0 mL/min; **Detection:** UV238 nm.

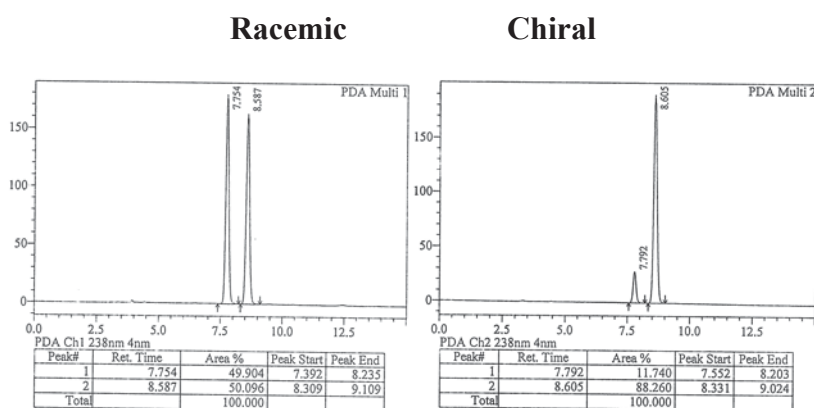

Table 2, 2b

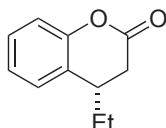

**HPLC Condition: Column:** Chiralpak OJ-H, Daicel Chemical Industries, Ltd.;  
**Eluent:** Hexanes/IPA (90/10); **Flow rate:** 1.0 mL/min; **Detection:** UV224 nm.

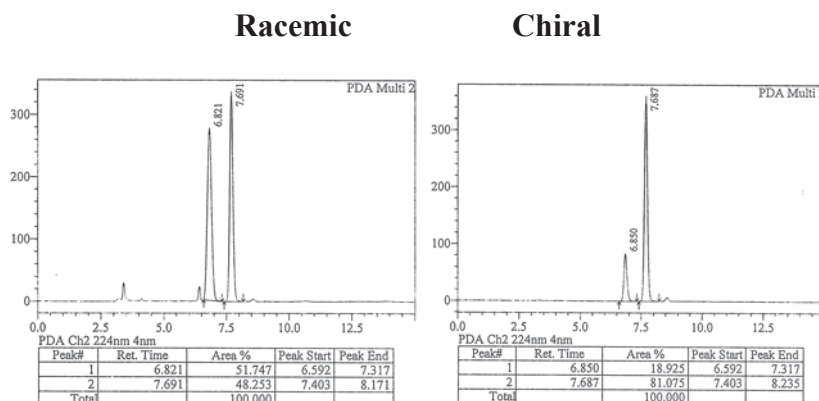

**Table 2, 2c**

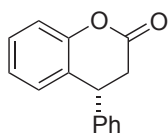

**HPLC Condition: Column:** Chiralpak OB-H, Daicel Chemical Industries, Ltd.;

**Eluent:** Hexanes/IPA (98/2); **Flow rate:** 1.0 mL/min; **Detection:** UV218 nm.

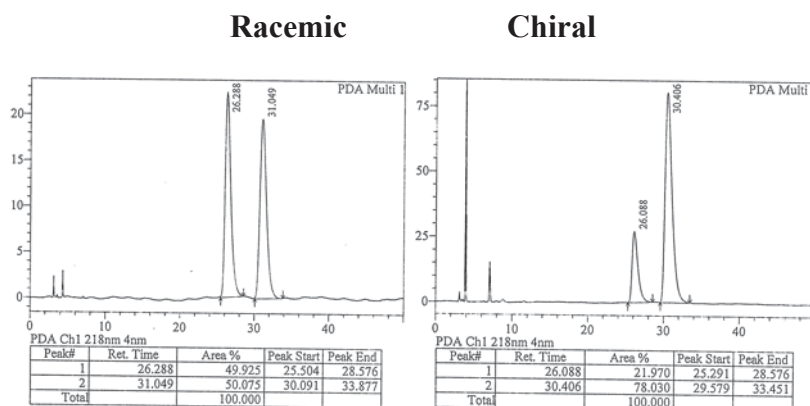

**Table 2, 2d**

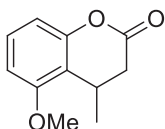

**HPLC Condition: Column:** Chiralpak OB-H, Daicel Chemical Industries, Ltd.;

**Eluent:** Hexanes/IPA (90/10); **Flow rate:** 1.0 mL/min; **Detection:** UV225 nm.

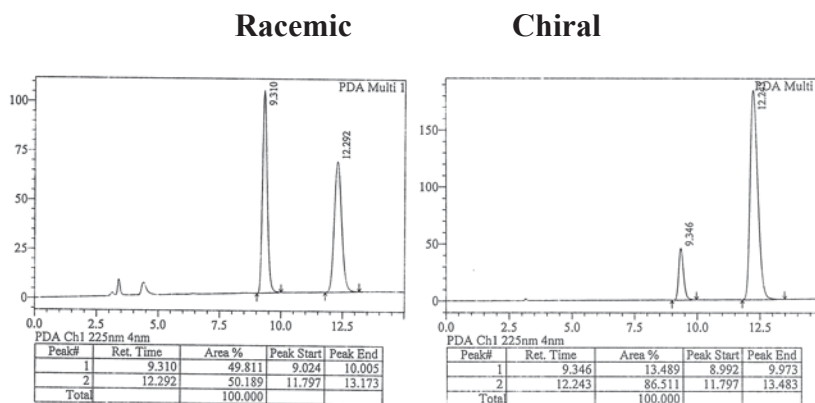

**Table 2, 2e**

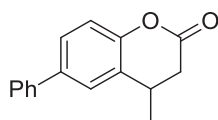

**HPLC Condition: Column:** Chiralpak OJ-H, Daicel Chemical Industries, Ltd.;  
**Eluent:** Hexanes/IPA (90/10); **Flow rate:** 1.0 mL/min; **Detection:** UV254 nm.

**Racemic**

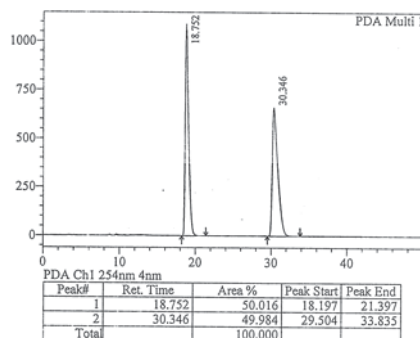

**Chiral**

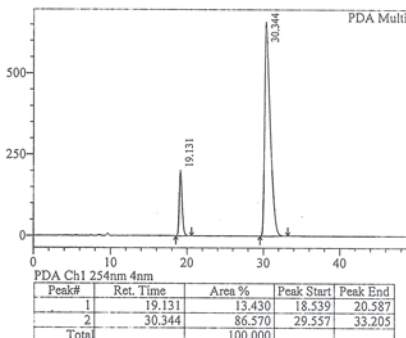

**Table 2, 2f**

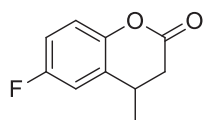

**HPLC Condition: Column:** Chiralpak OJ-H, Daicel Chemical Industries, Ltd.;  
**Eluent:** Hexanes/IPA (90/10); **Flow rate:** 1.0 mL/min; **Detection:** UV224 nm.

**Racemic**

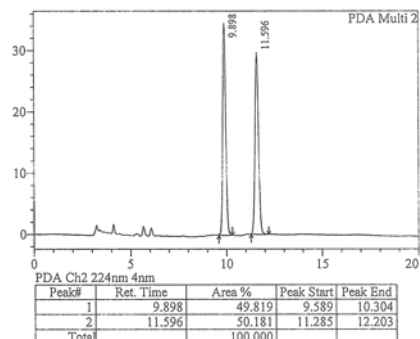

**Chiral**

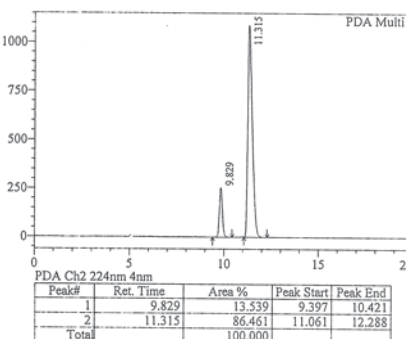



**Table 2, 2g**

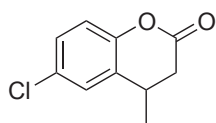

**HPLC Condition: Column:** Chiralpak OB-H, Daicel Chemical Industries, Ltd.;

**Eluent:** Hexanes/IPA (90/10); **Flow rate:** 1.0 mL/min; **Detection:** UV238 nm.

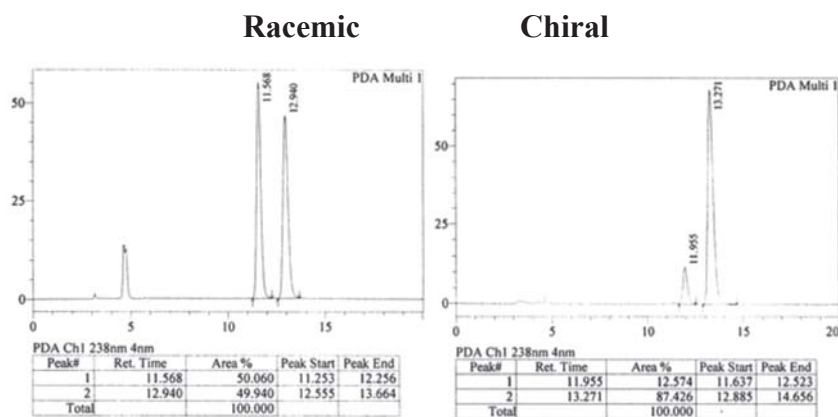

**Table 2, 2h**

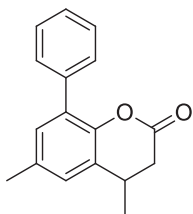

**HPLC Condition: Column:** Chiralpak IA, Daicel Chemical Industries, Ltd.;

**Eluent:** Hexanes/IPA (99.5/0.5); **Flow rate:** 1.0 mL/min; **Detection:** UV224 nm.

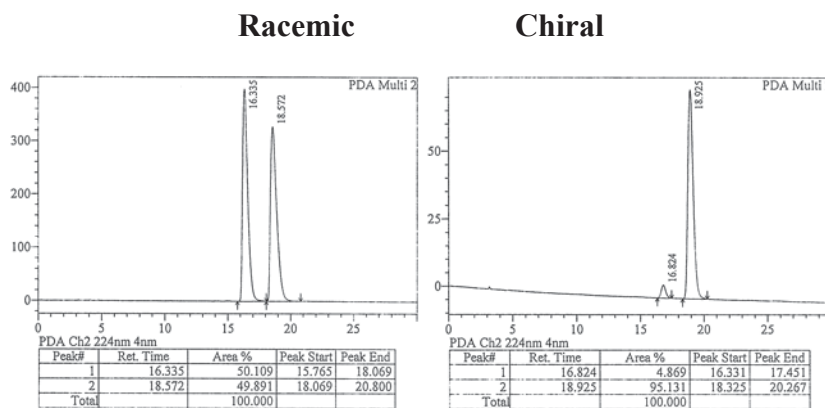

**Table 2, 2i**

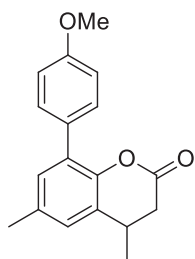

**HPLC Condition: Column:** Chiralpak IB, Daicel Chemical Industries, Ltd.;

**Eluent:** Hexanes/IPA (99/1); **Flow rate:** 1.0 mL/min; **Detection:** UV254 nm.

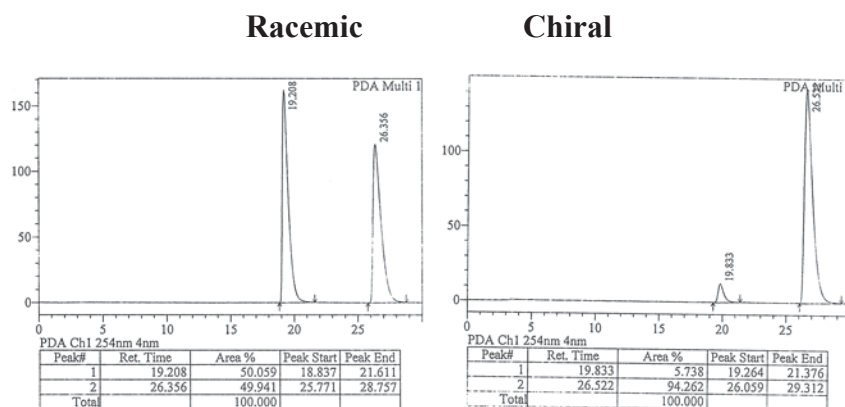

**Table 2, 2j**

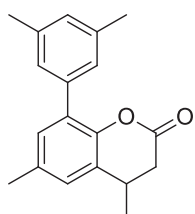

**HPLC Condition: Column:** Chiralpak IB, Daicel Chemical Industries, Ltd.;

**Eluent:** Hexanes/IPA (99.5/0.5); **Flow rate:** 1.0 mL/min; **Detection:** UV224 nm.

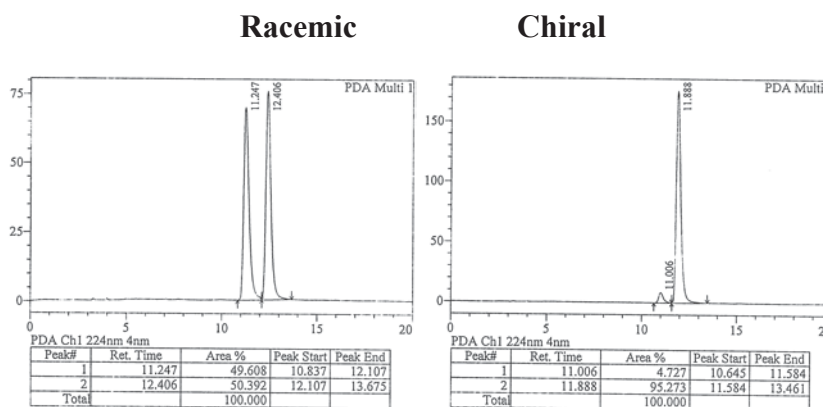

Table 2, 20

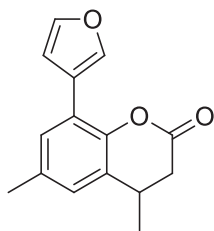

HPLC Condition: Column: Chiralpak IB, Daicel Chemical Industries, Ltd.;

Eluent: Hexanes/IPA (99/1); Flow rate: 1.0 mL/min; Detection: UV224 nm.

Racemic

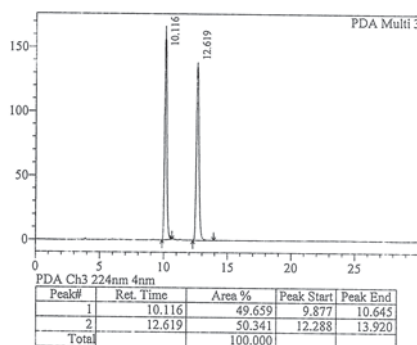

Chiral

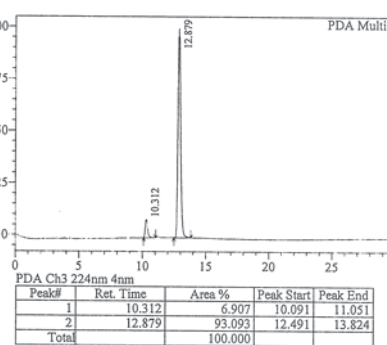

Table 2, 21

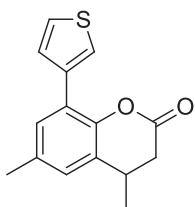

HPLC Condition: Column: Chiralpak IB, Daicel Chemical Industries, Ltd.;

Eluent: Hexanes/IPA (99/1); Flow rate: 1.0 mL/min; Detection: UV254 nm.

Racemic

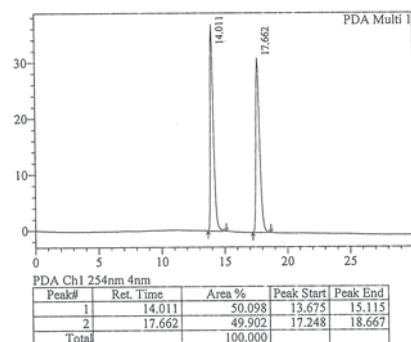

Chiral

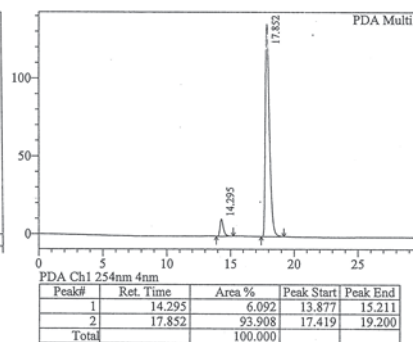

**Table 2, 2m**

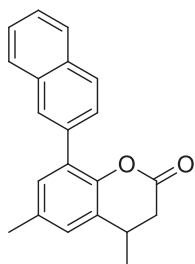

**HPLC Condition: Column:** Chiralpak IA, Daicel Chemical Industries, Ltd.;

**Eluent:** Hexanes/IPA (99/1); **Flow rate:** 1.0 mL/min; **Detection:** UV254 nm.

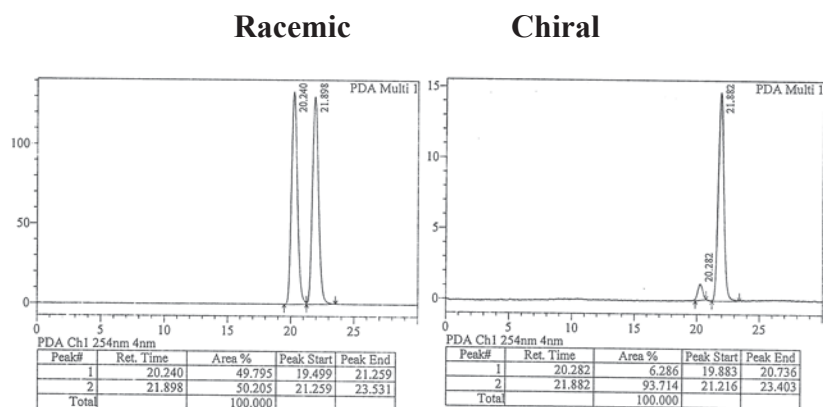

**Table 2, 2n**

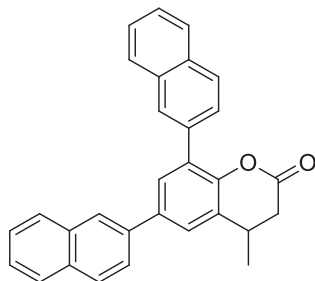

**HPLC Condition: Column:** Chiralpak IA, Daicel Chemical Industries, Ltd.;

**Eluent:** Hexanes/IPA (90/10); **Flow rate:** 1.0 mL/min; **Detection:** UV254 nm.

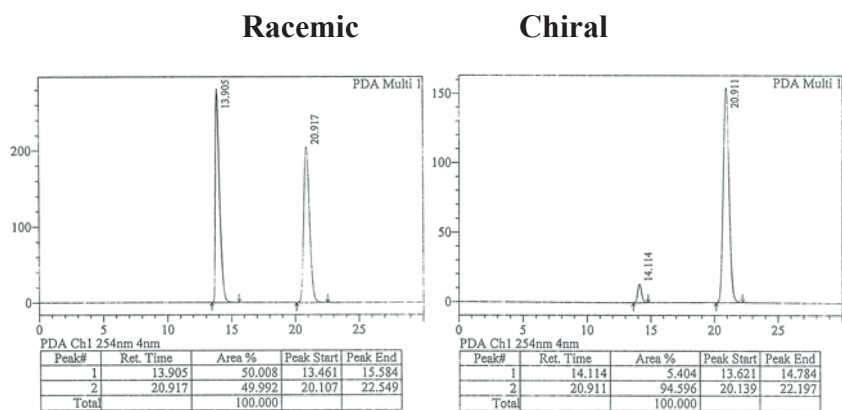

**Table 2, 2o**

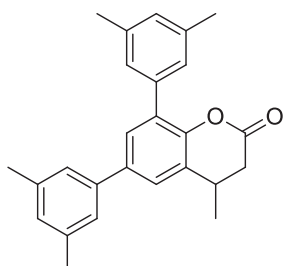

**HPLC Condition: Column:** Chiralpak IA, Daicel Chemical Industries, Ltd.;

**Eluent:** Hexanes/IPA (99/1); **Flow rate:** 1.0 mL/min; **Detection:** UV254 nm.

**Racemic**

**Chiral**

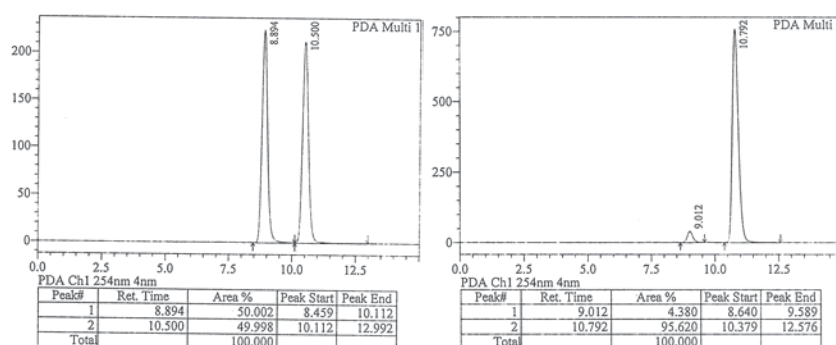

**Table 2, 2p**

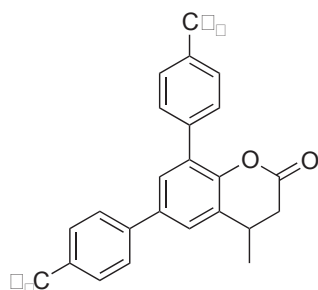

**HPLC Condition: Column:** Chiralpak IA, Daicel Chemical Industries, Ltd.;

**Eluent:** Hexanes/IPA (90/10); **Flow rate:** 1.0 mL/min; **Detection:** UV254 nm.

**Racemic**

**Chiral**

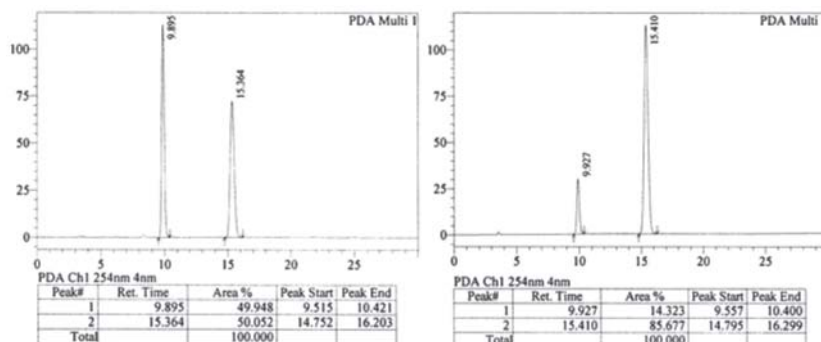

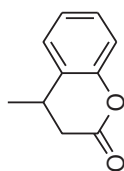

Table 2, 2a

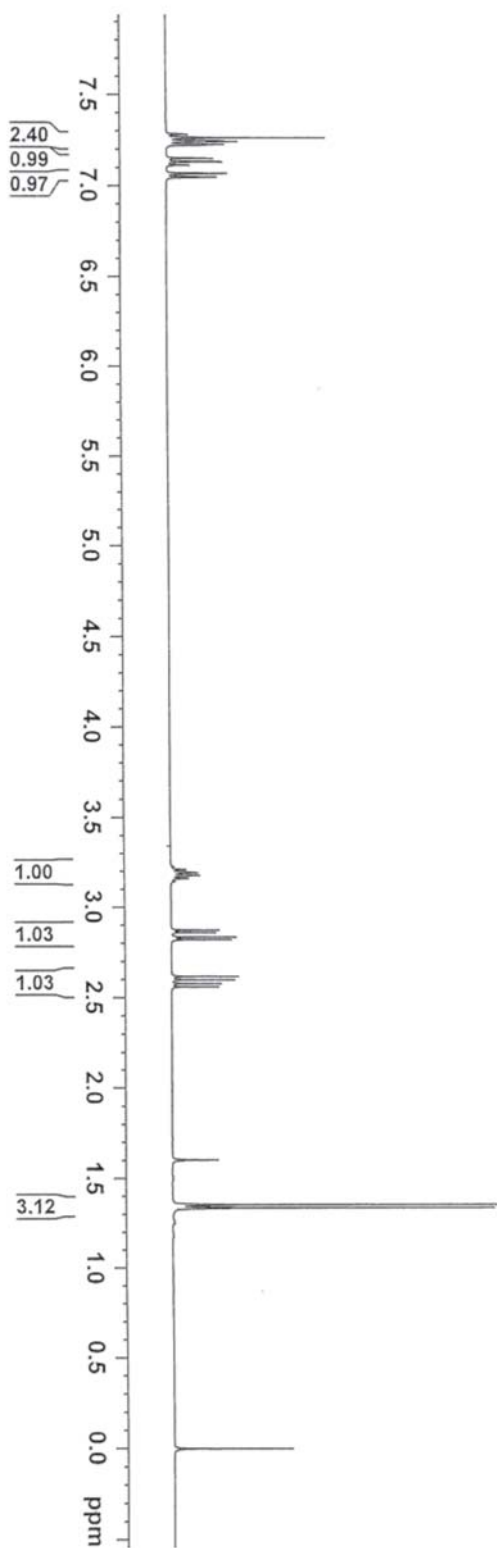

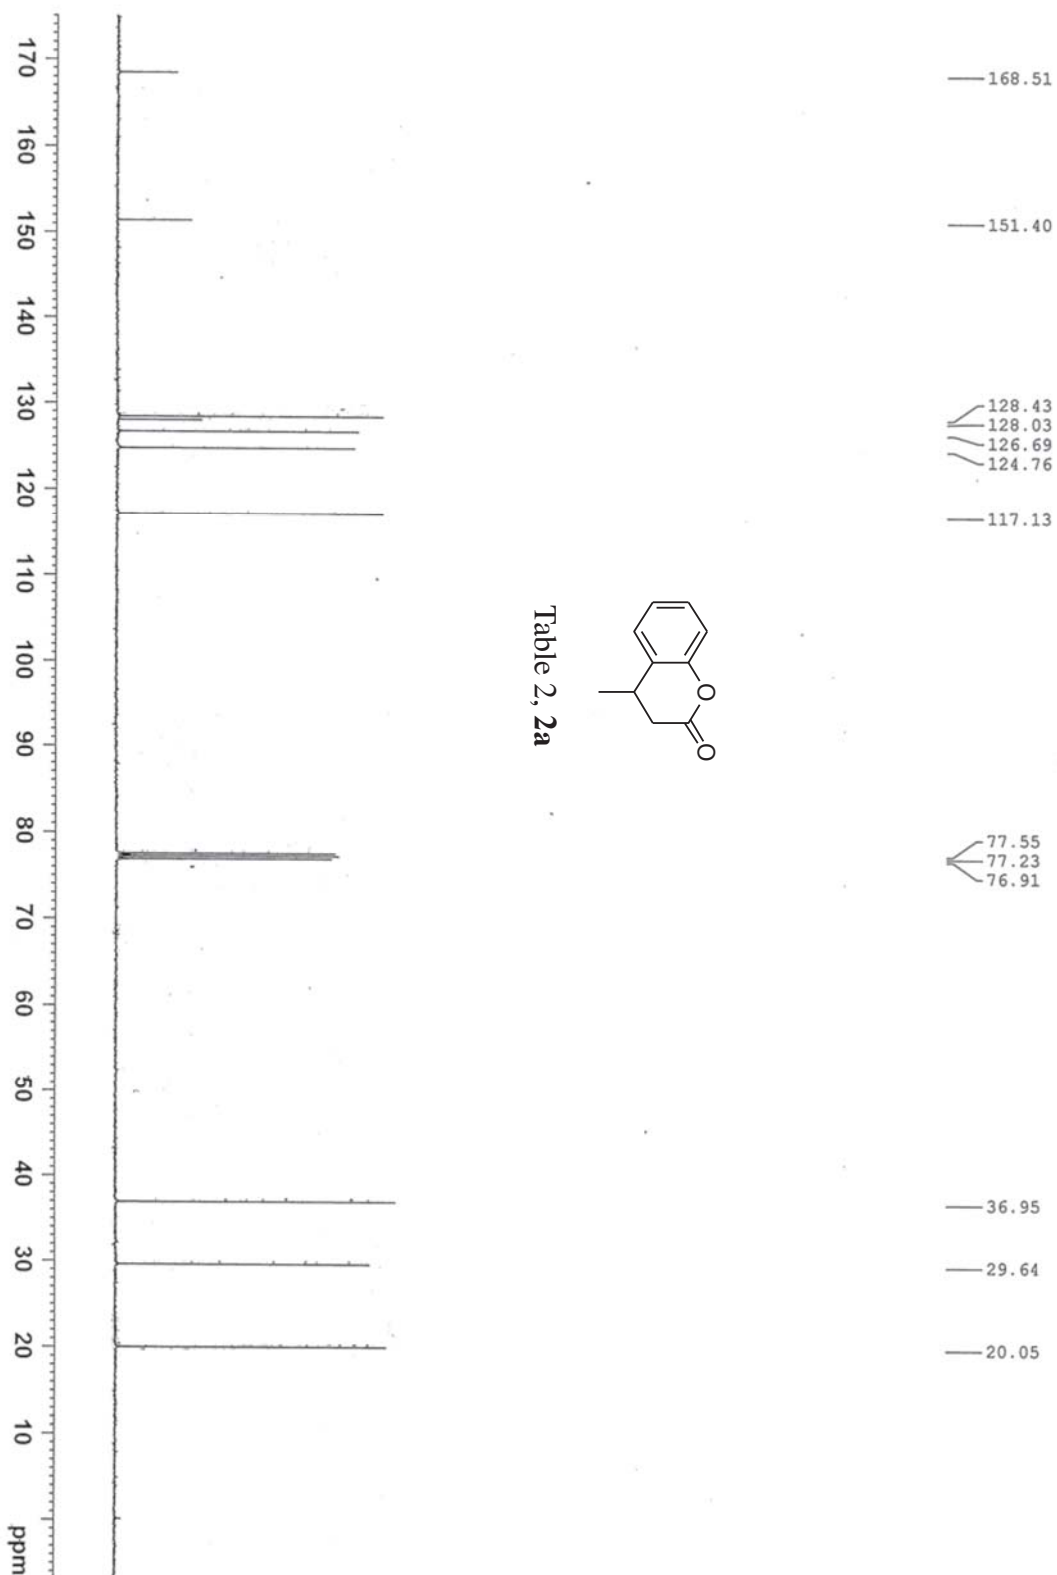

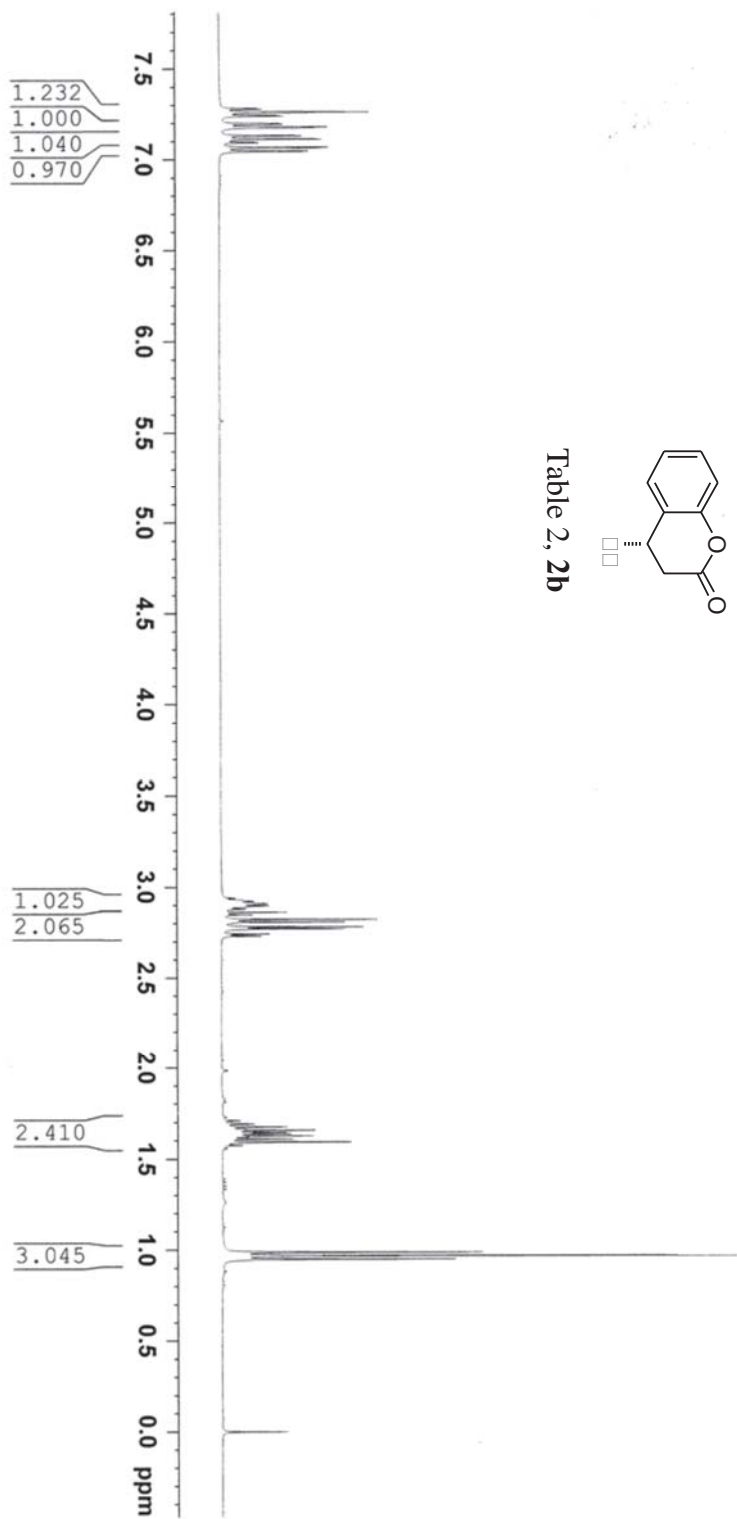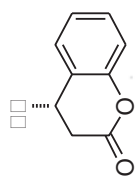

Table 2, 2b



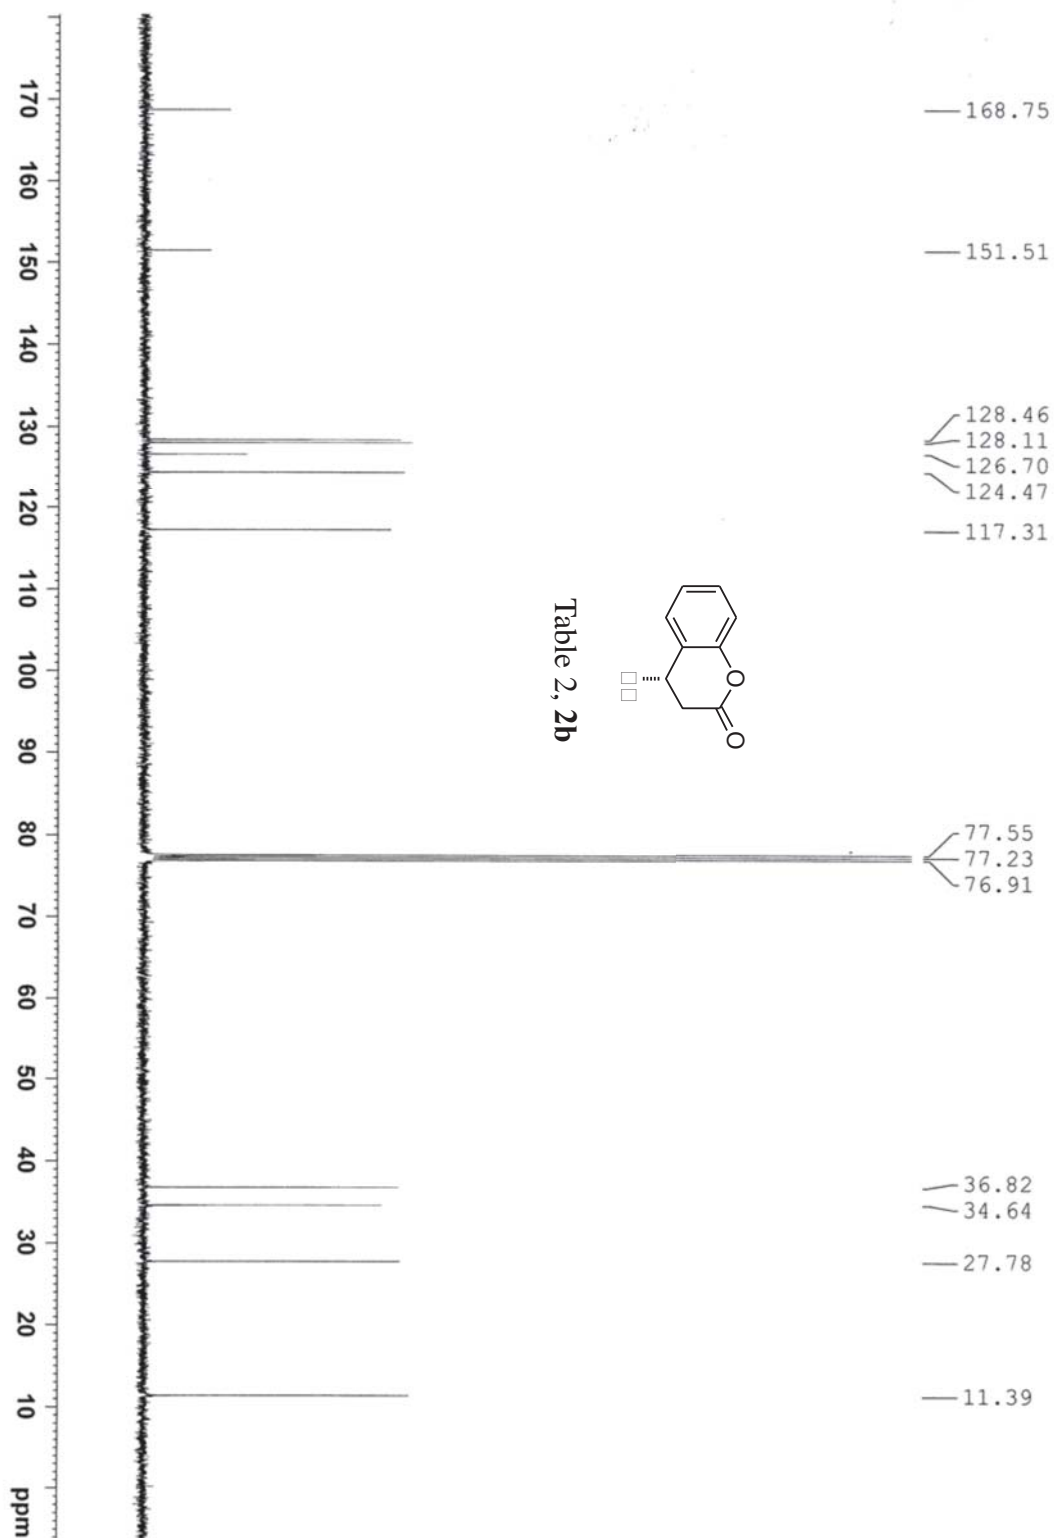

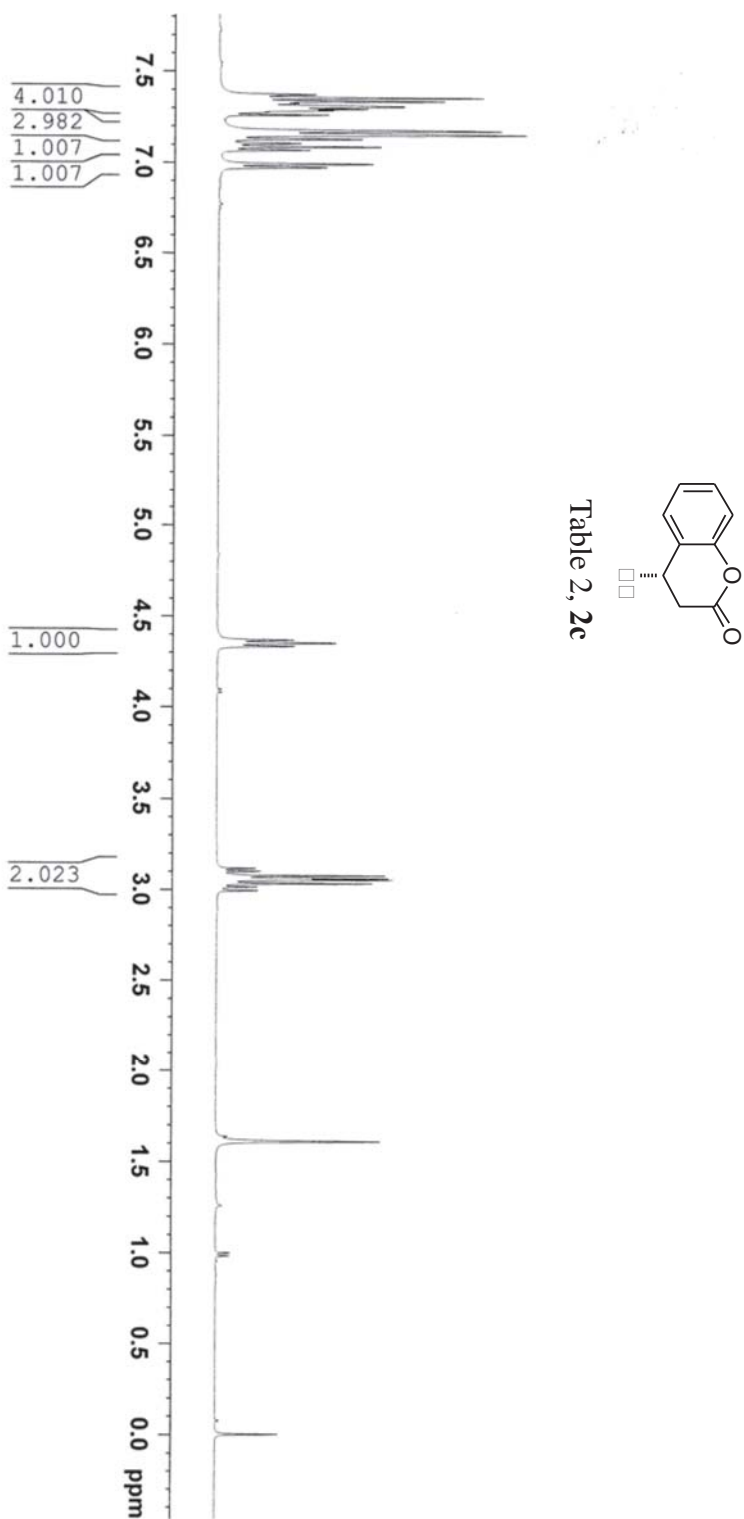

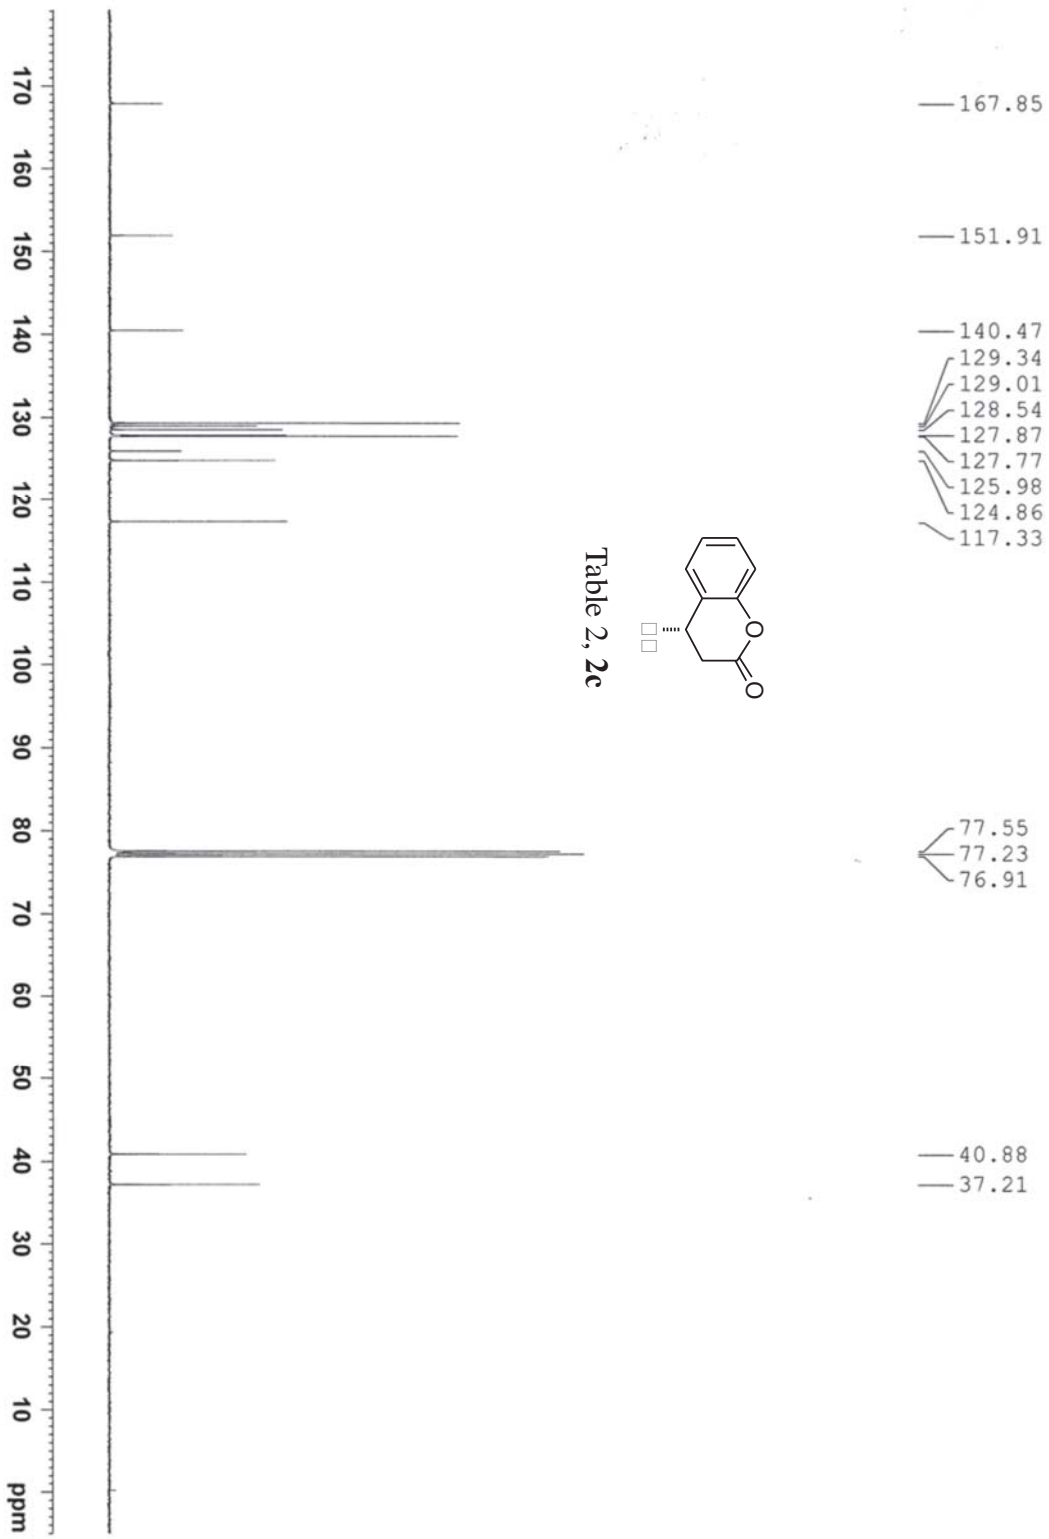

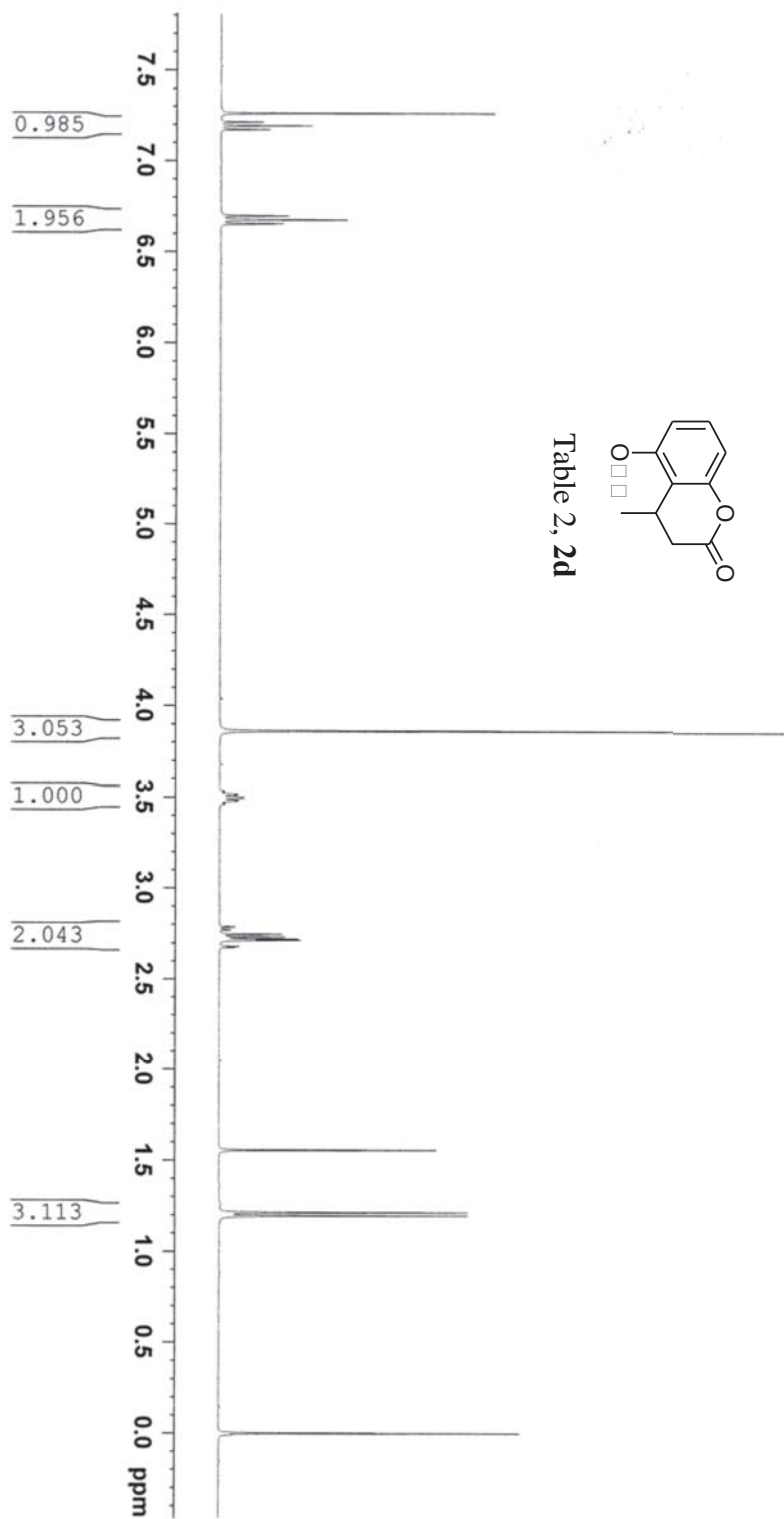

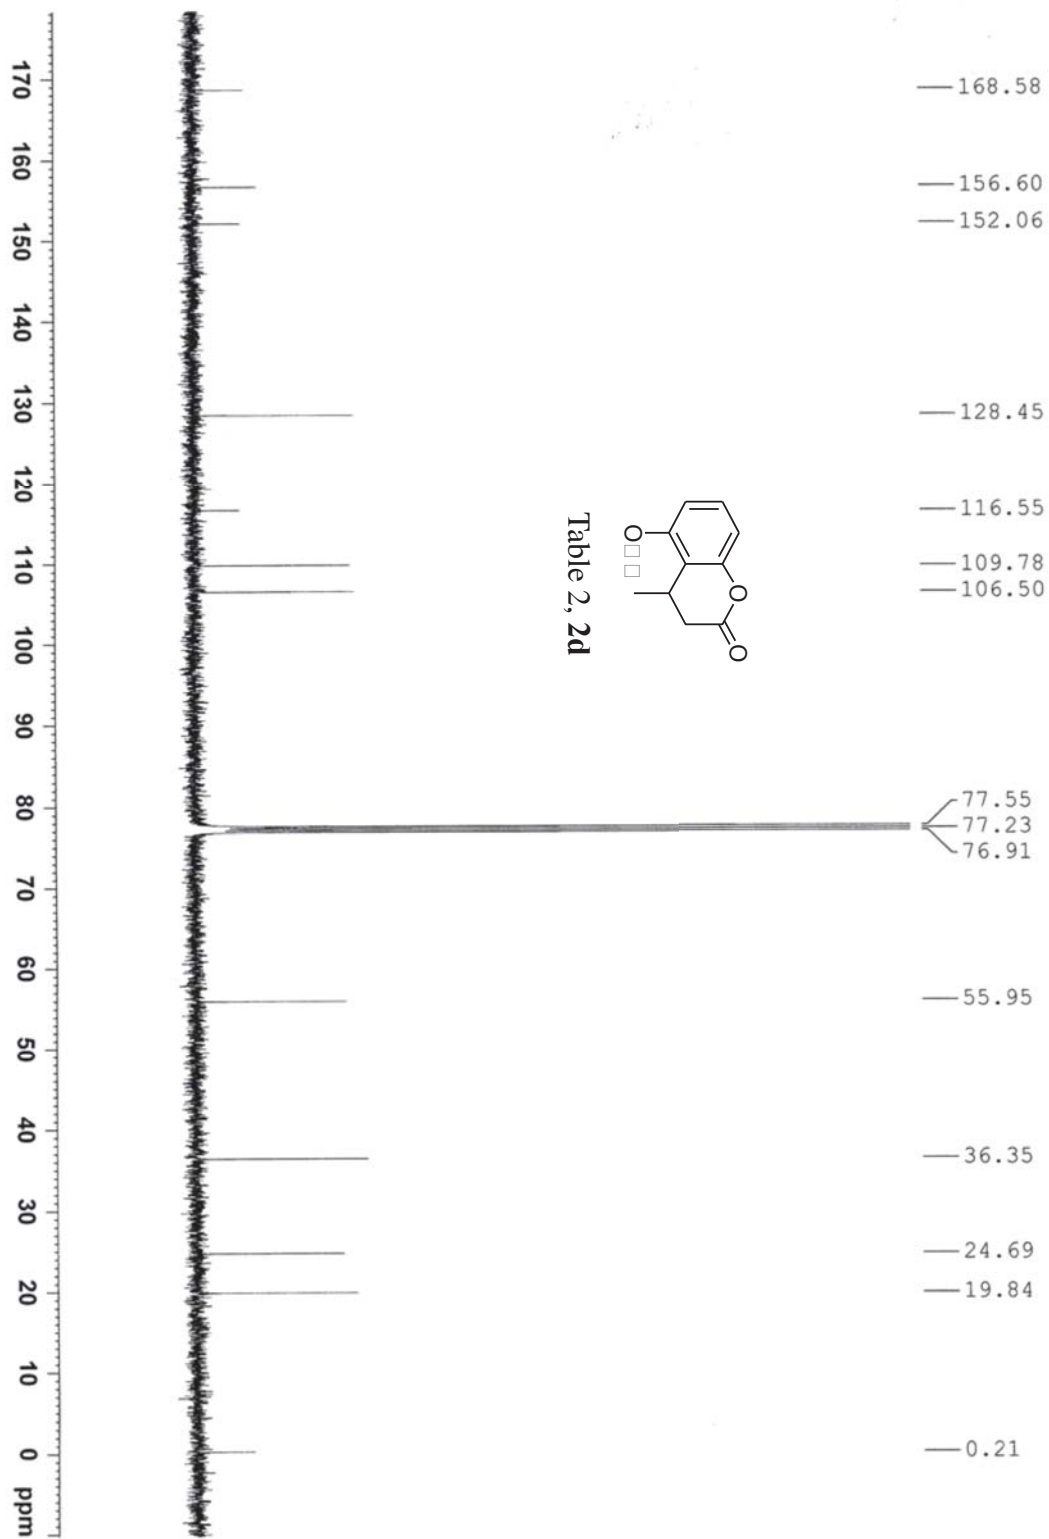

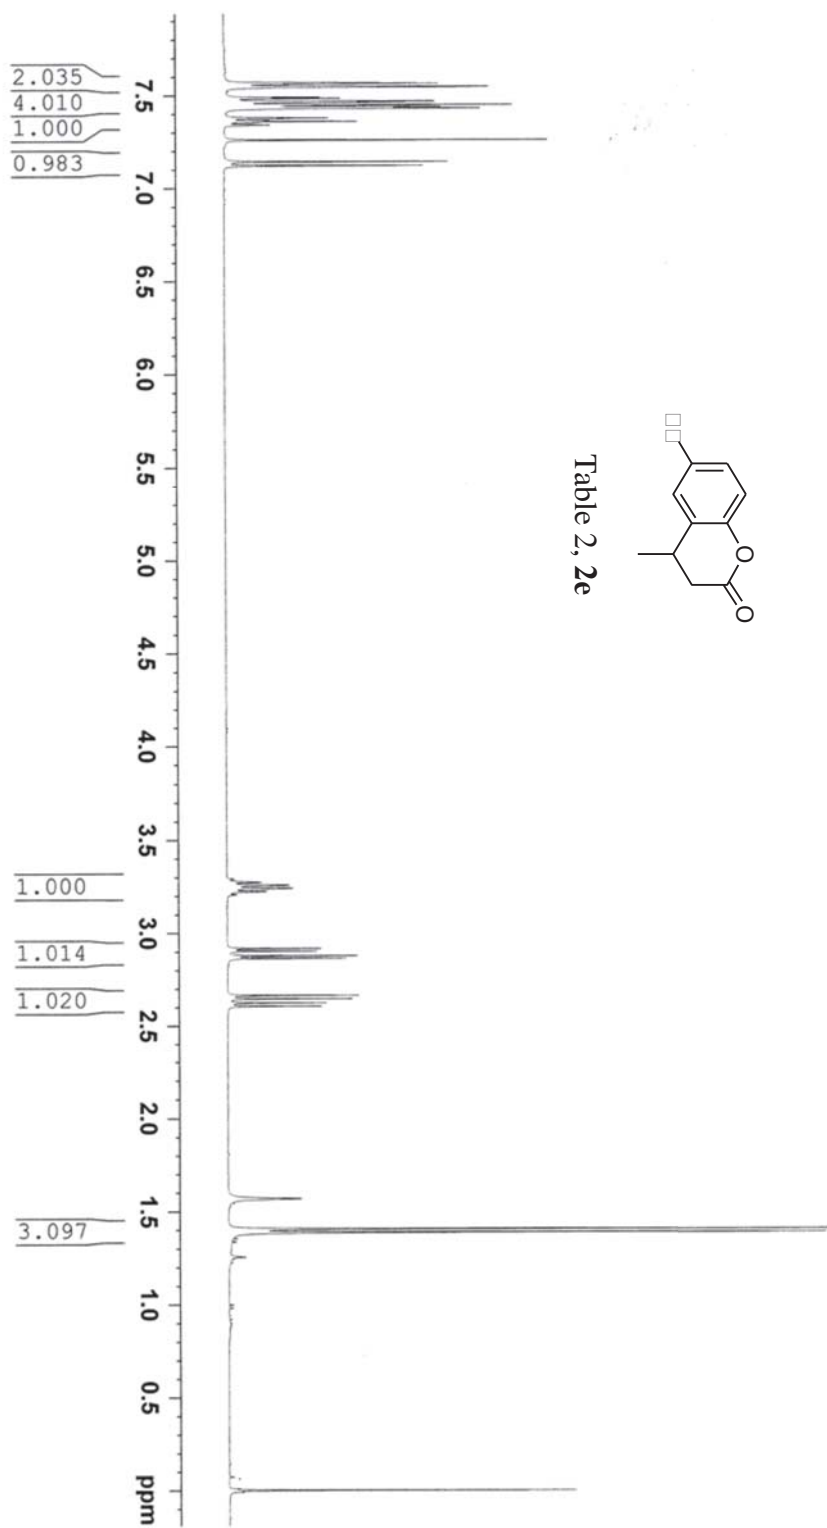

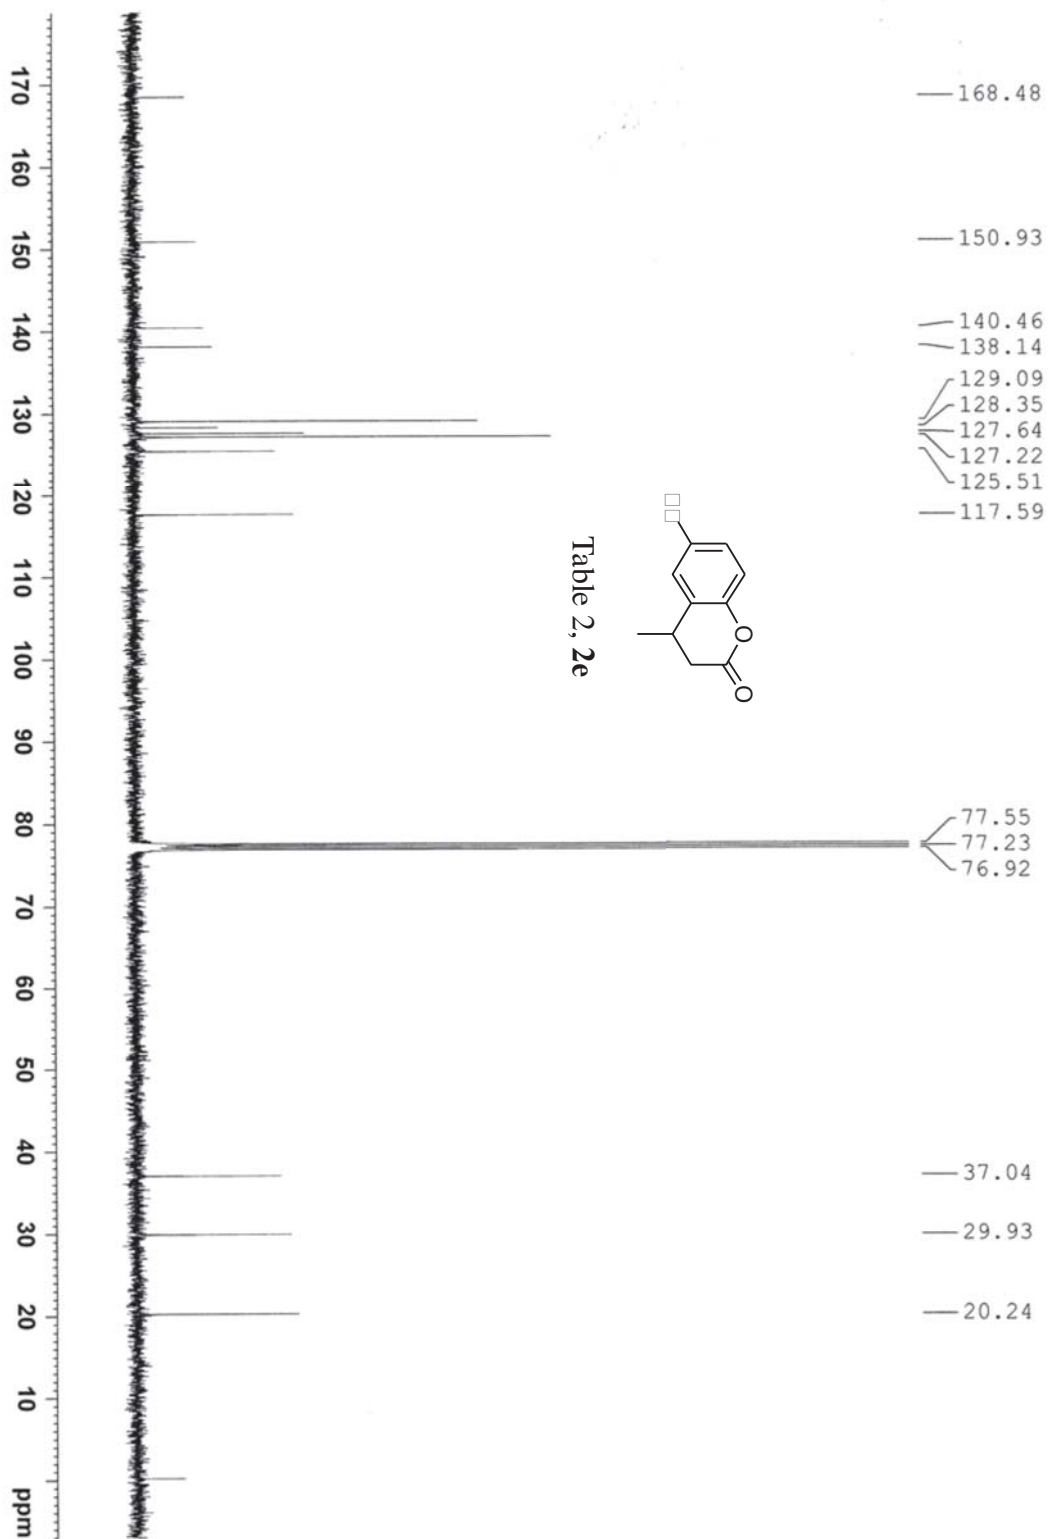

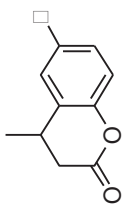

Table 2, 2f

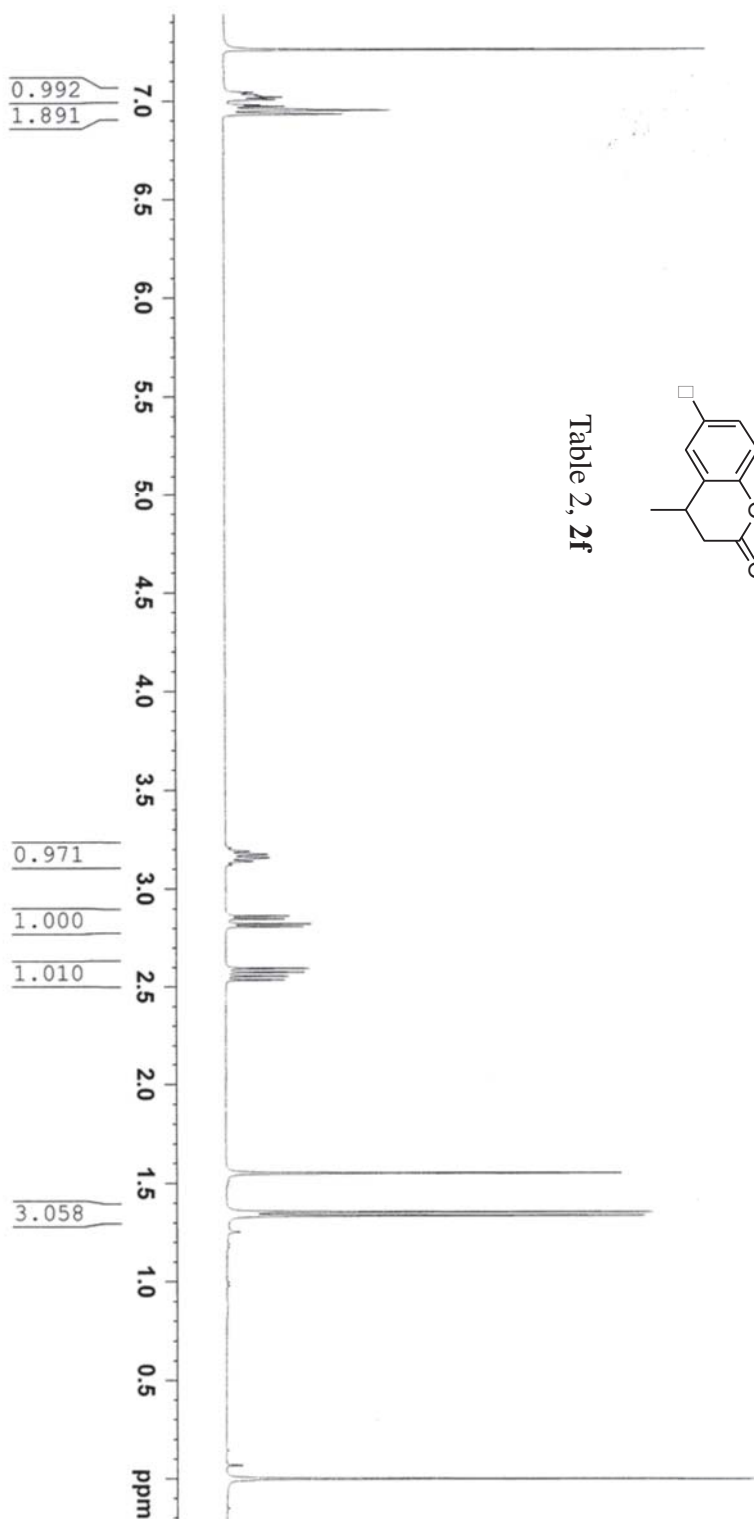



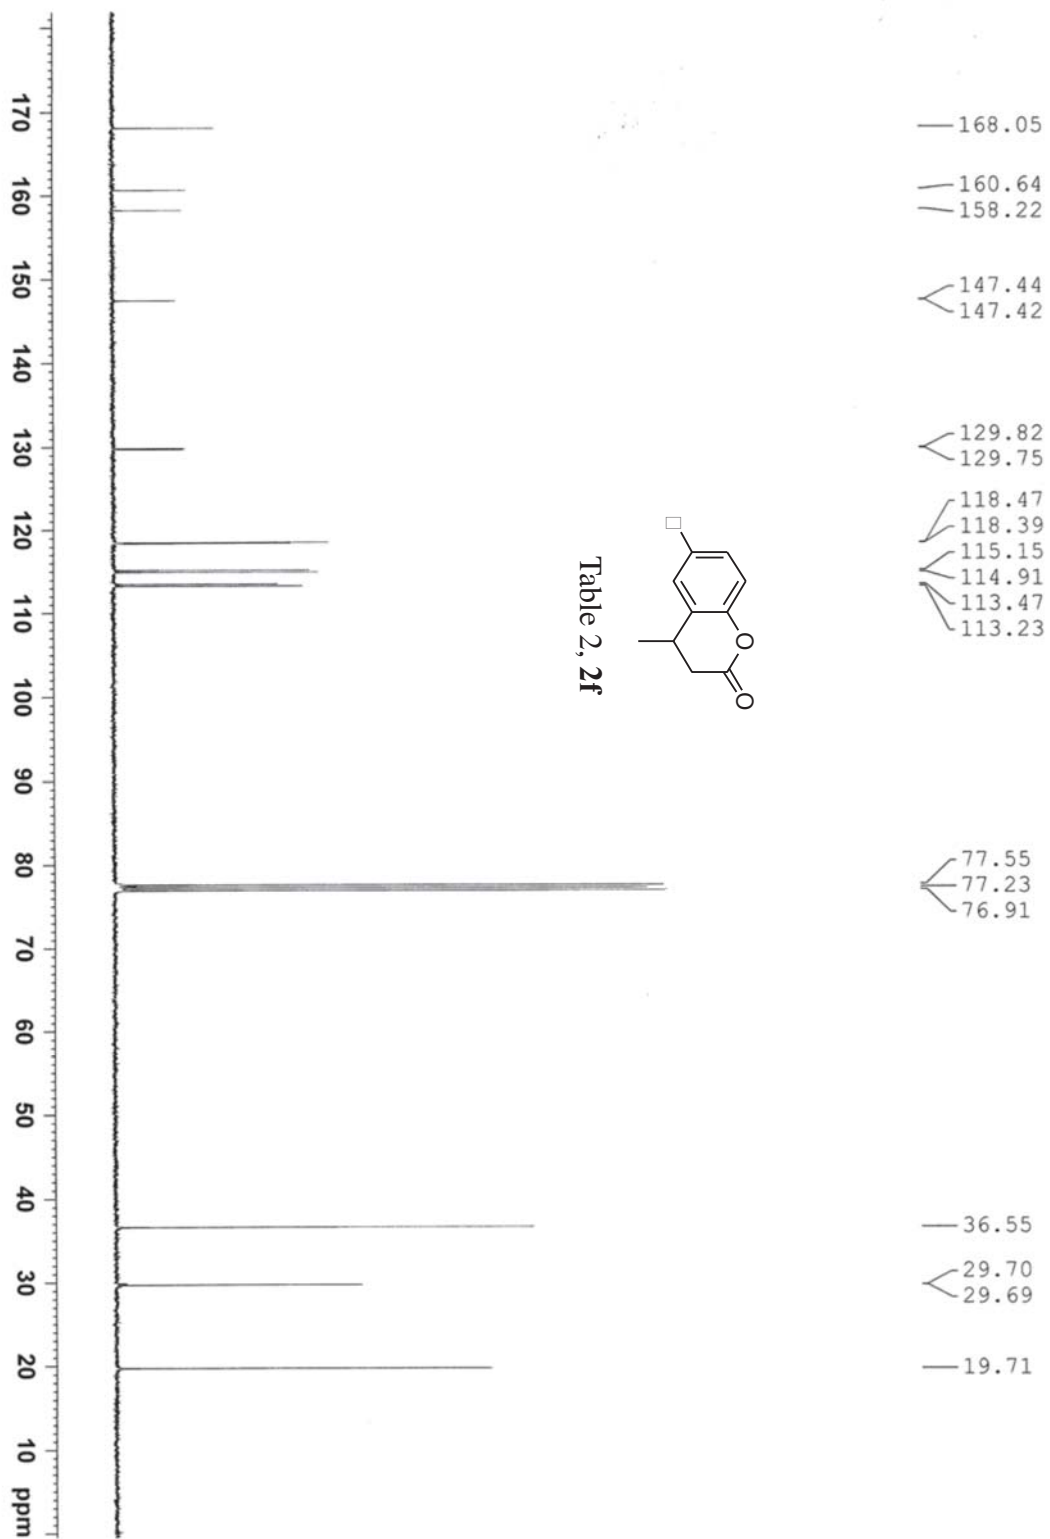

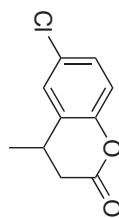

Table 2, **2g**

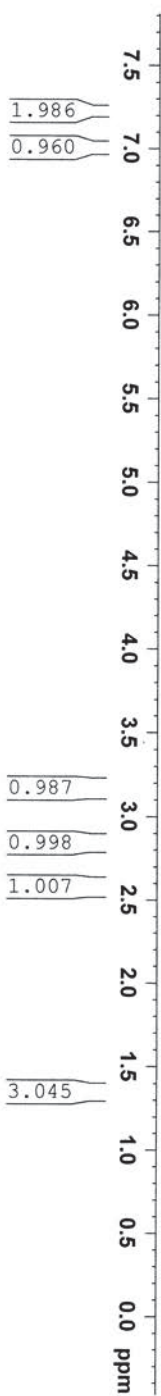

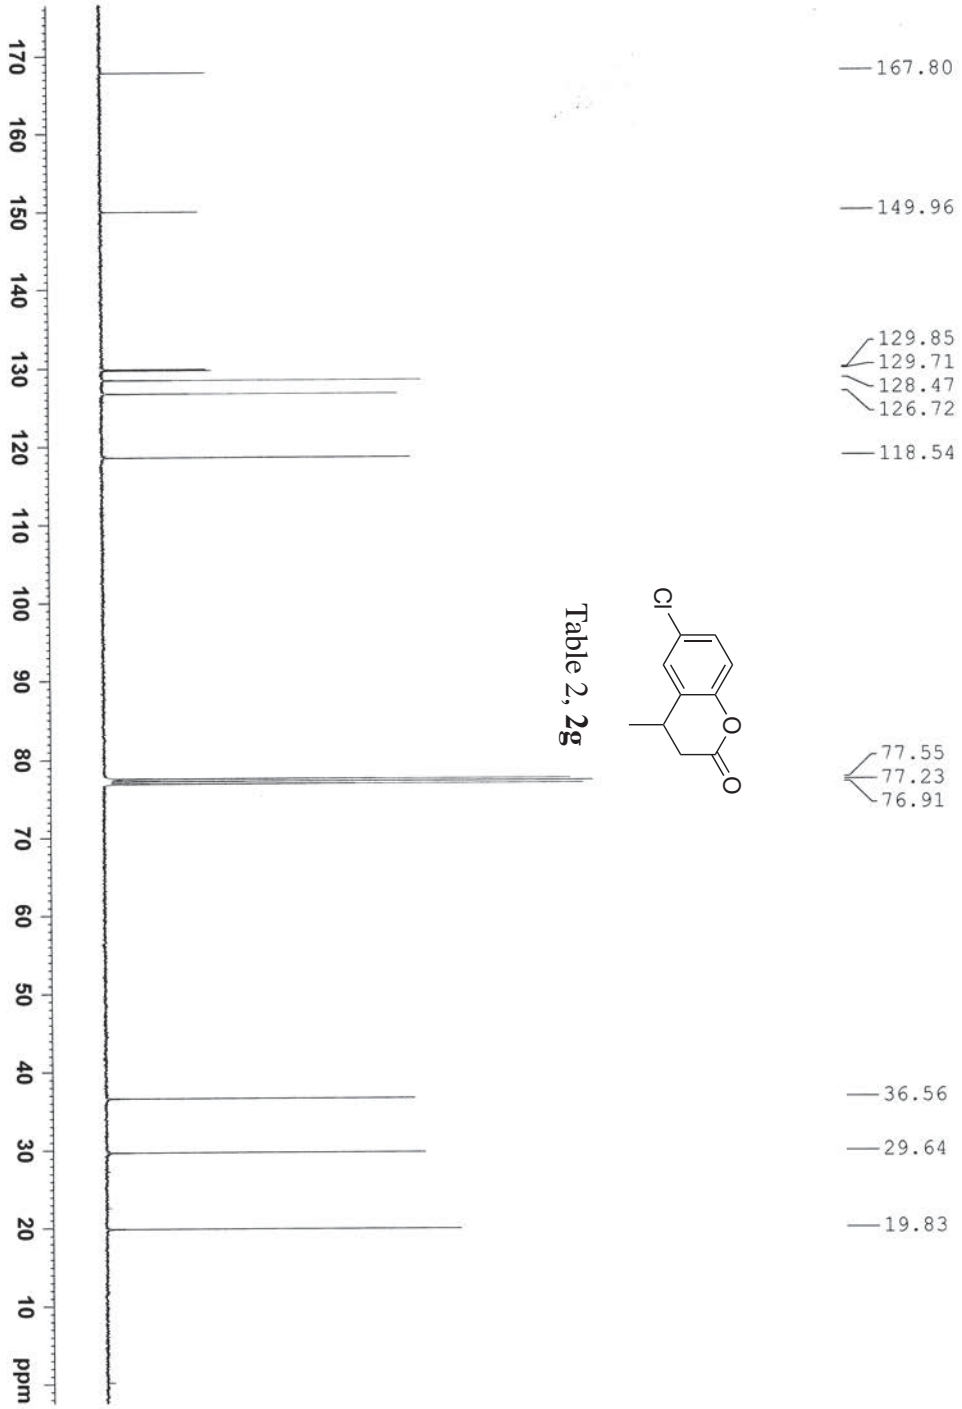

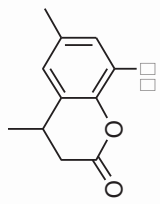

Table 2, 2h

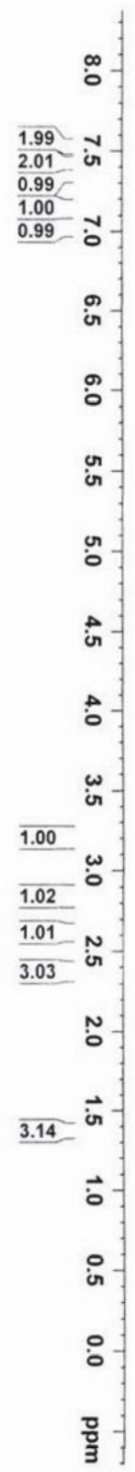

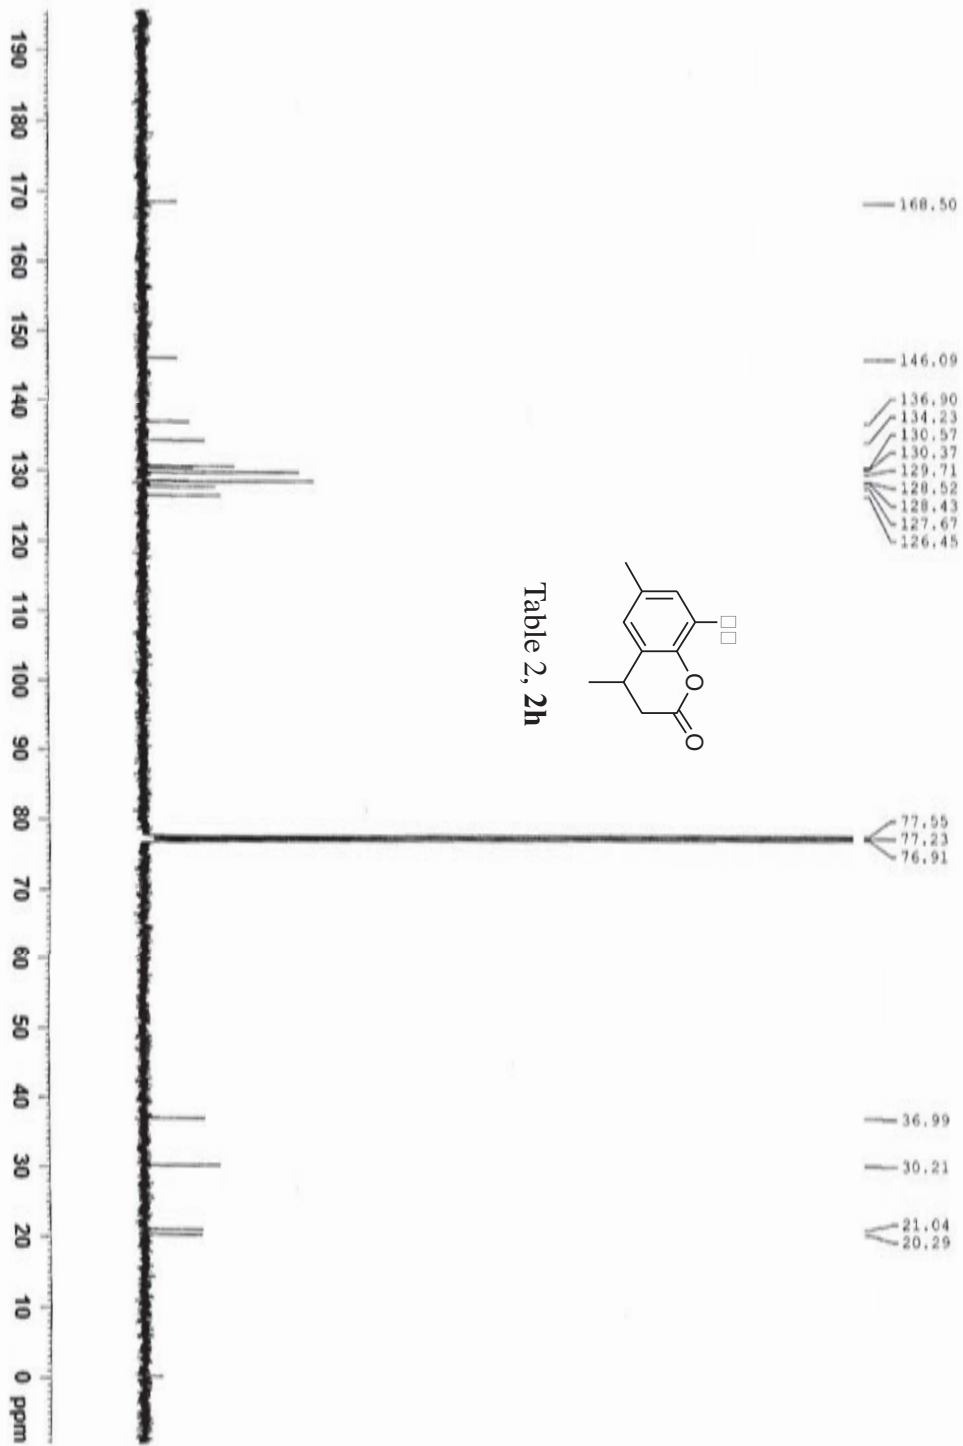

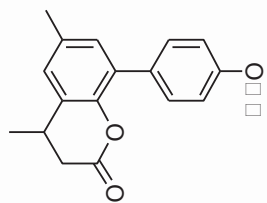

Table 2, 2i

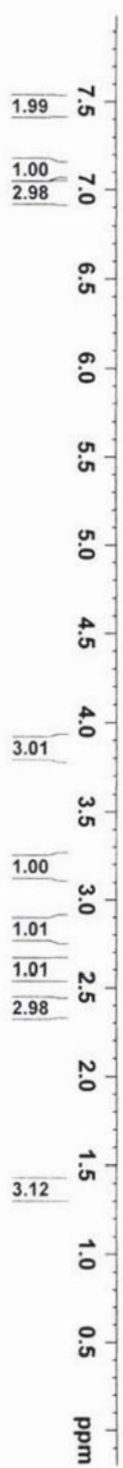

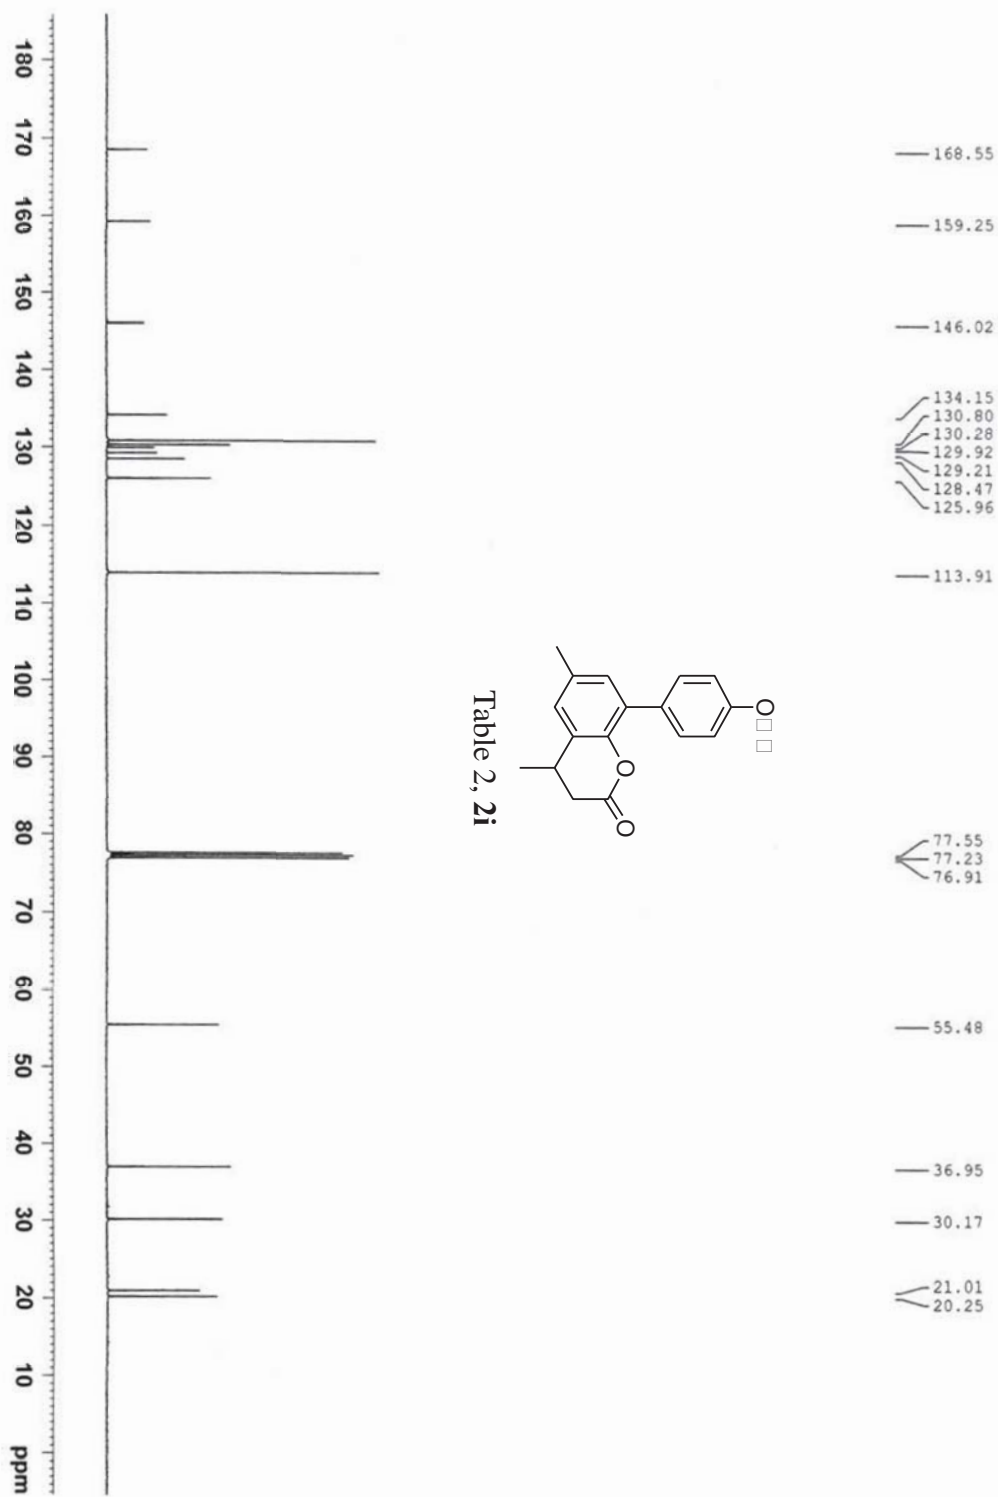

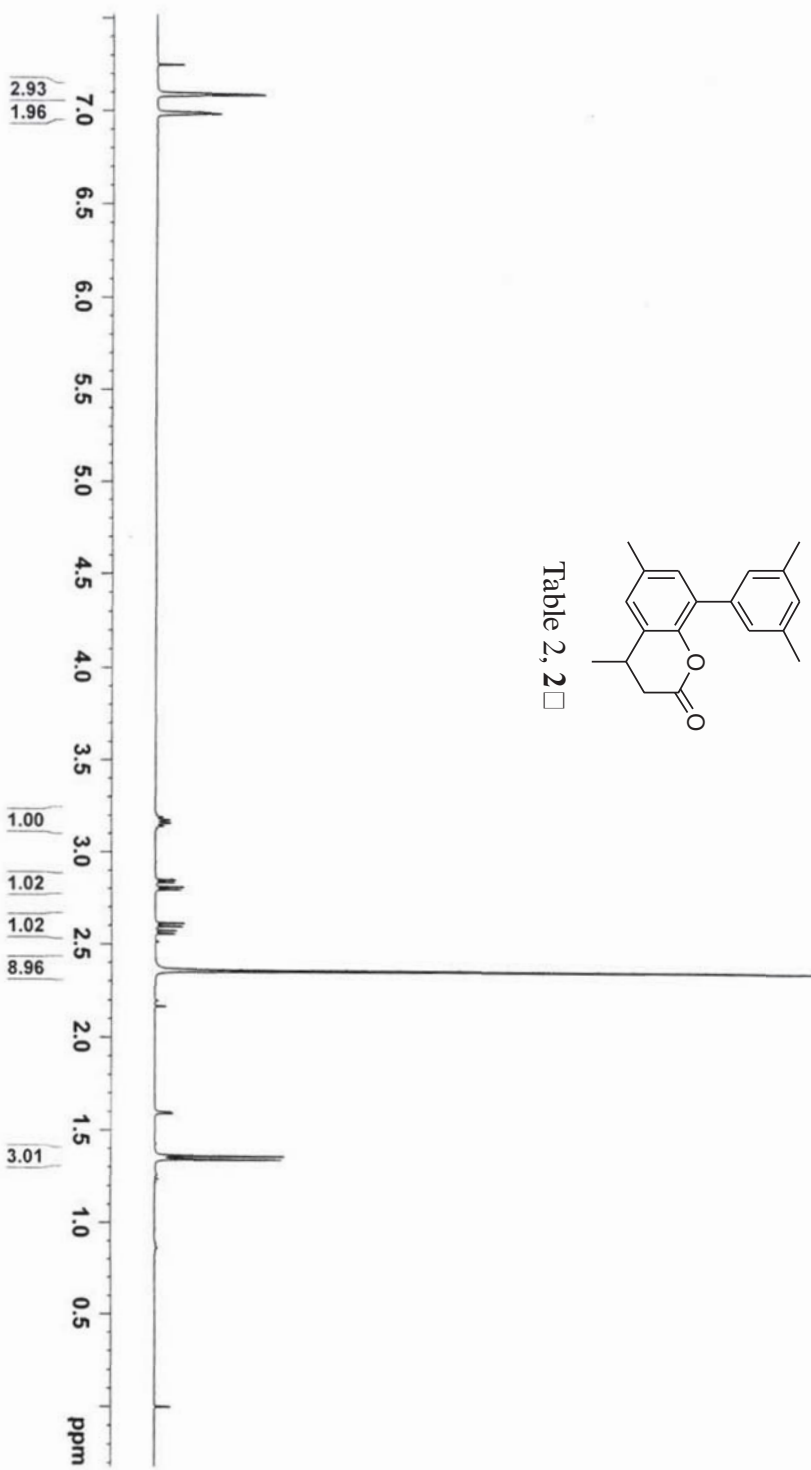



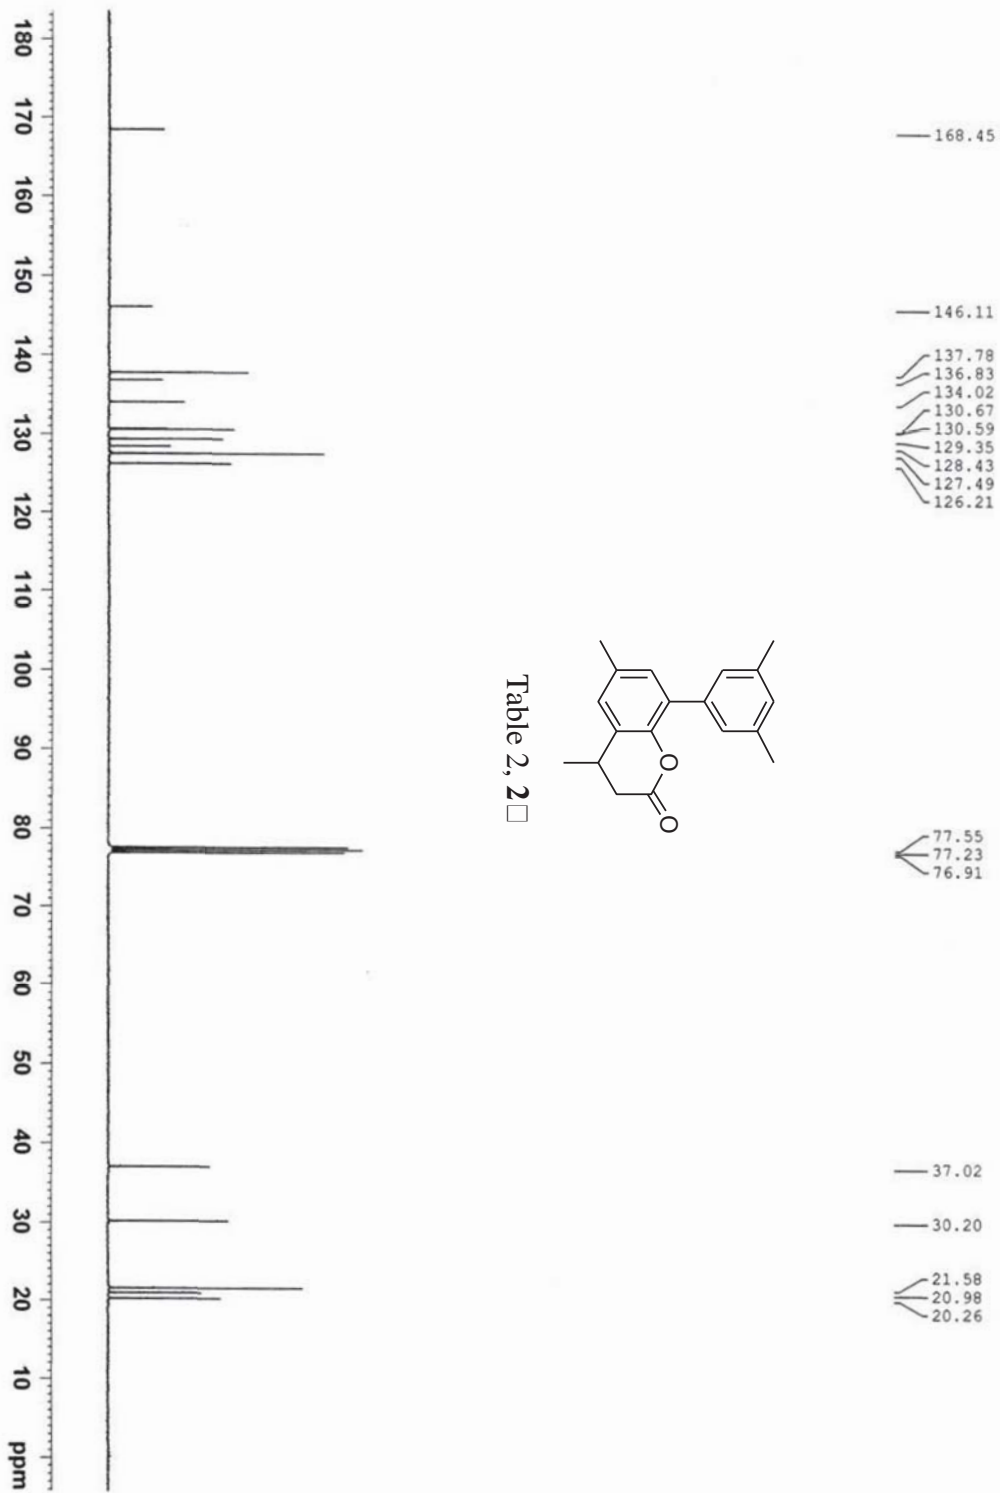

Table 2, 2 □

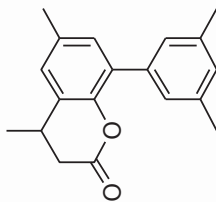

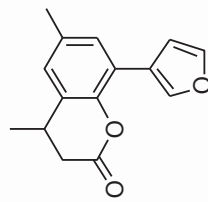

Table 2, 2 □

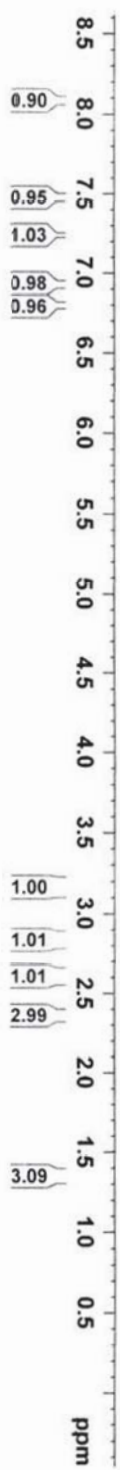

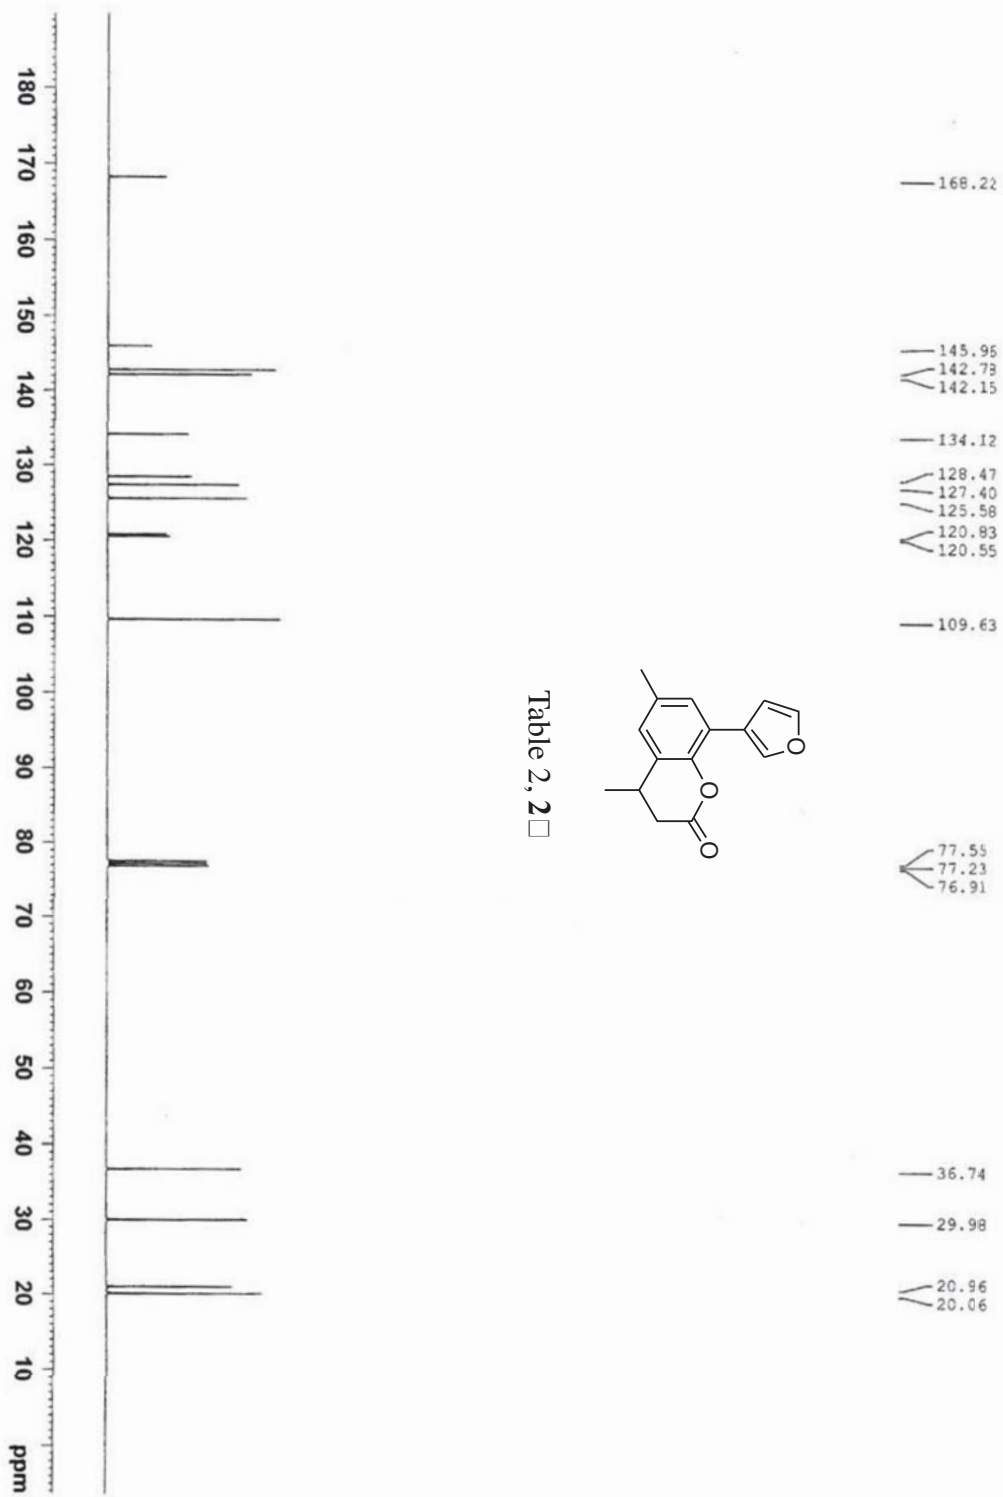

Table 2, 2 □

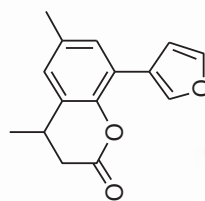

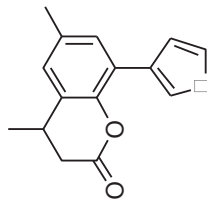

Table 2, 21

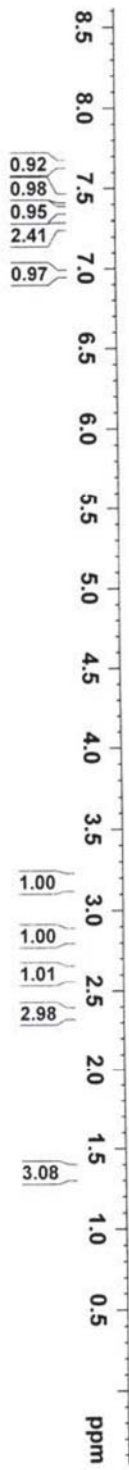

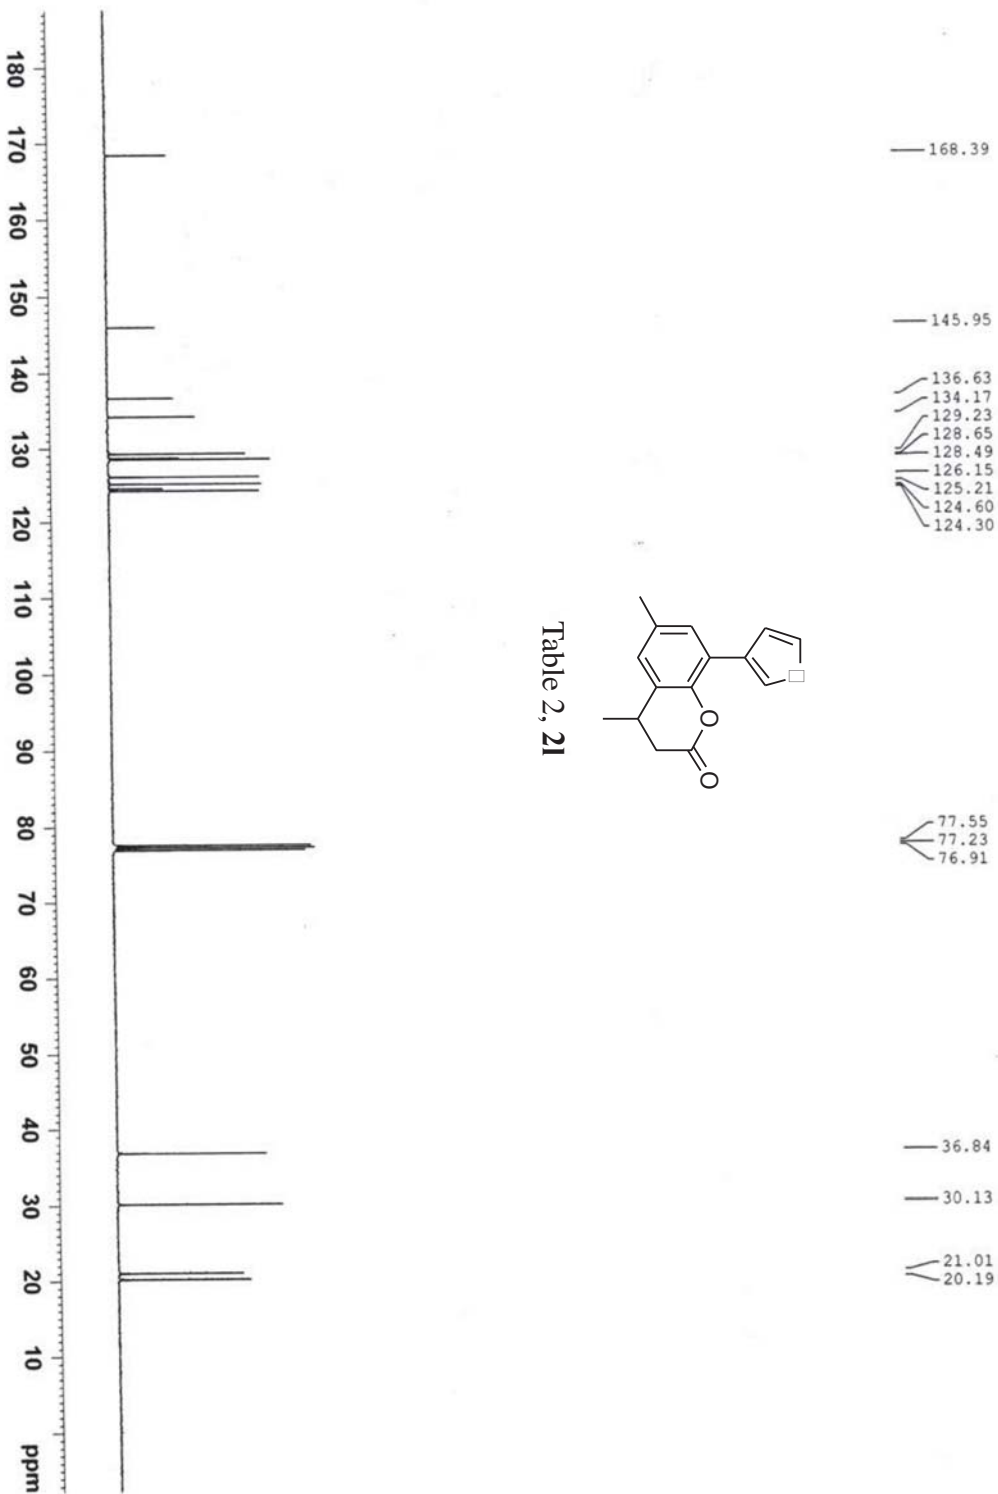

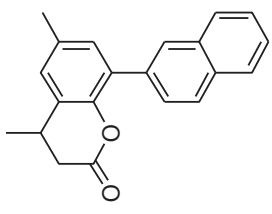

Table 2, 2m

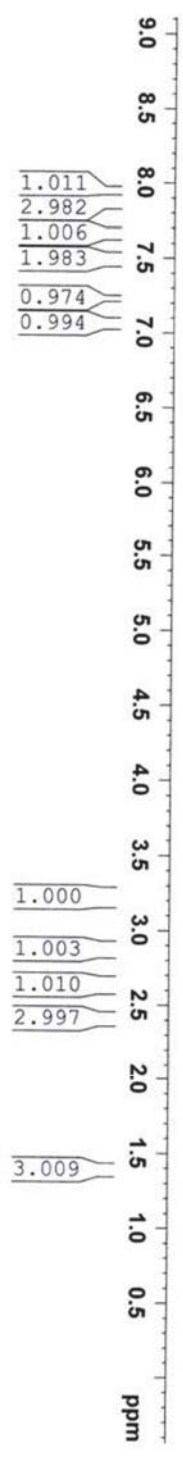

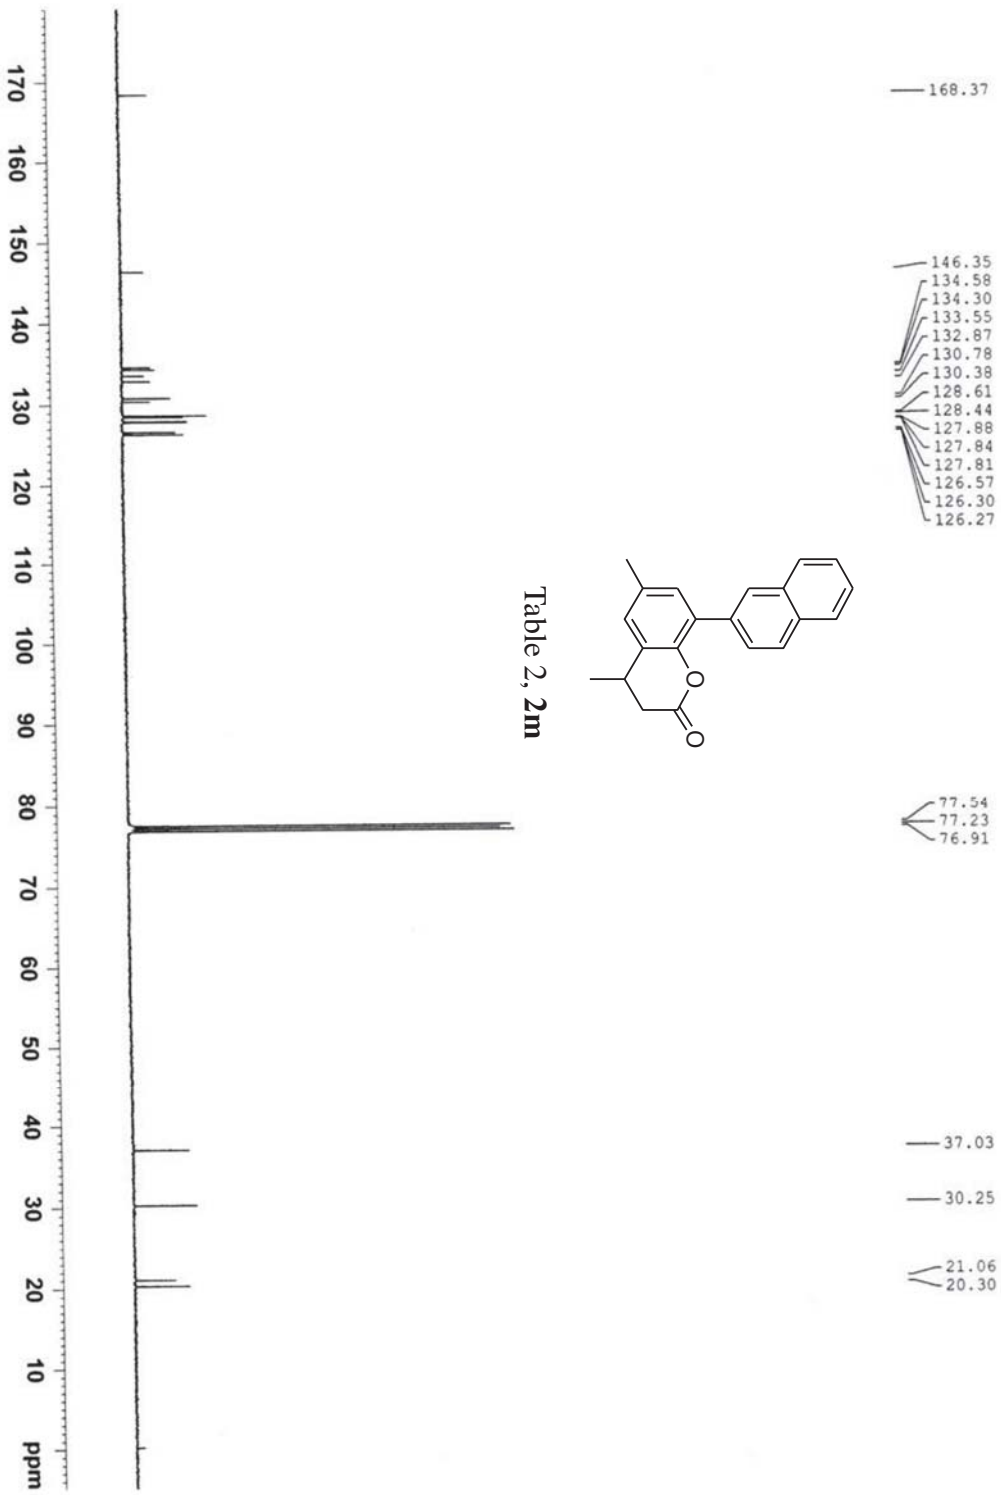

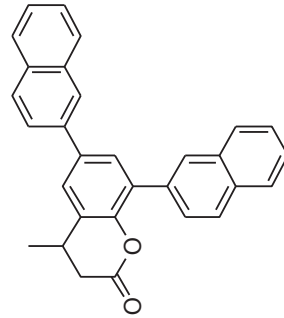

Table 2, 2n

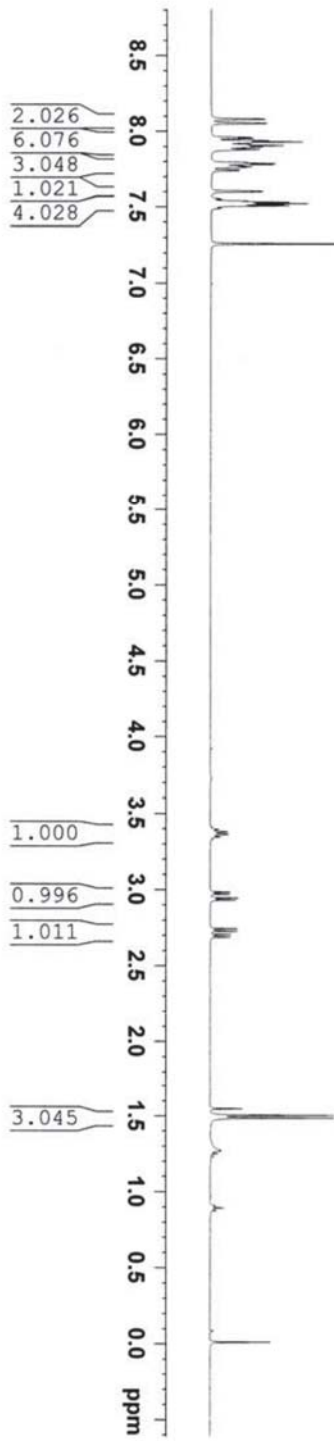



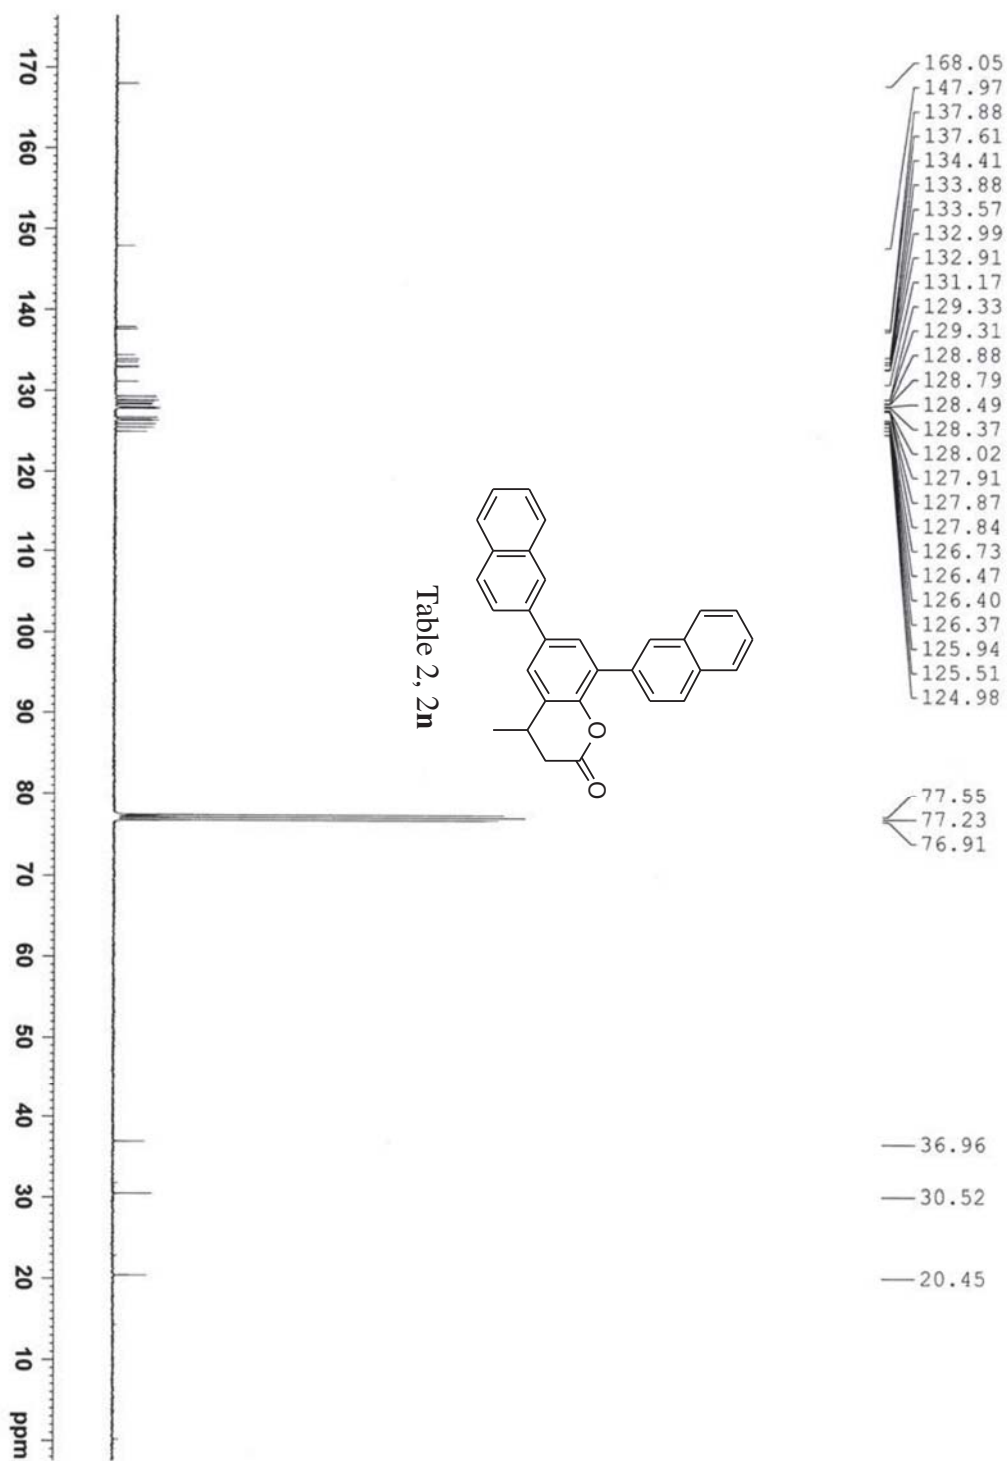

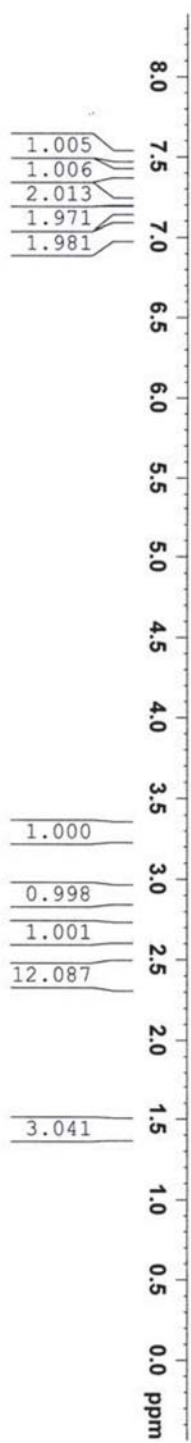

Table 2, 20

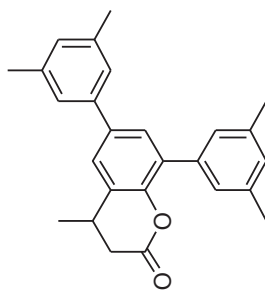

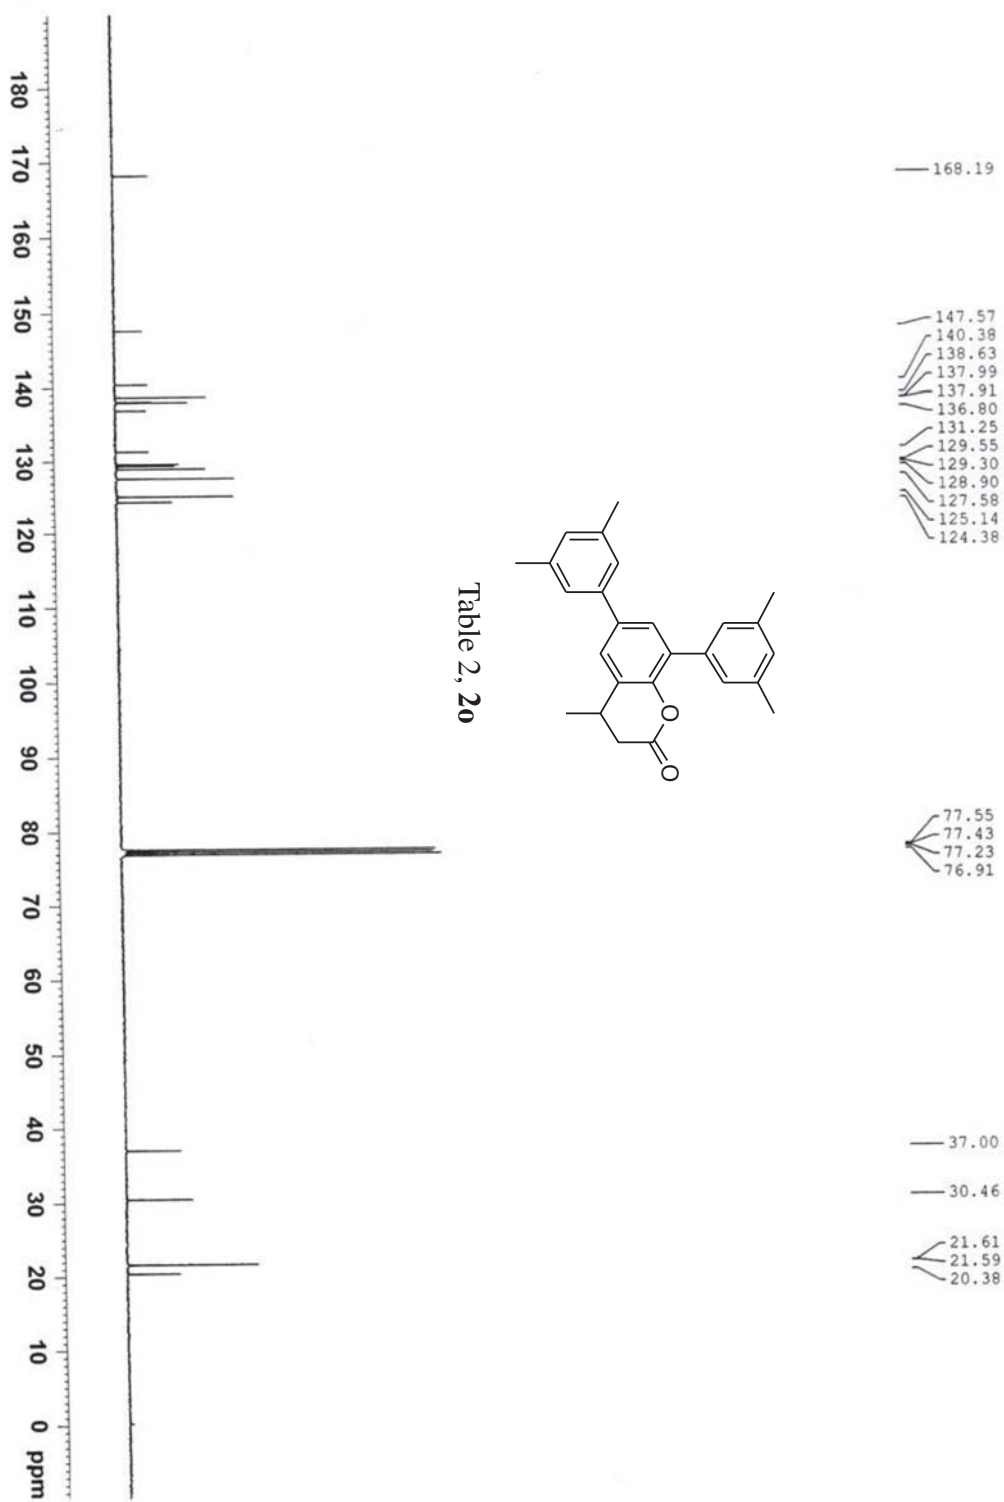

Table 2, 20

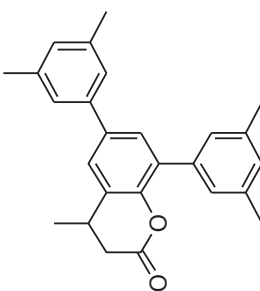

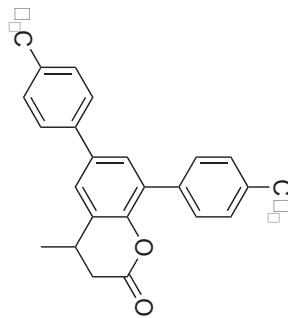

Table 2, 2

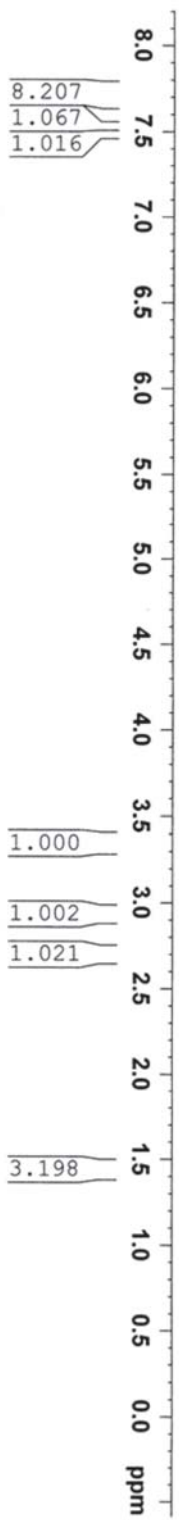

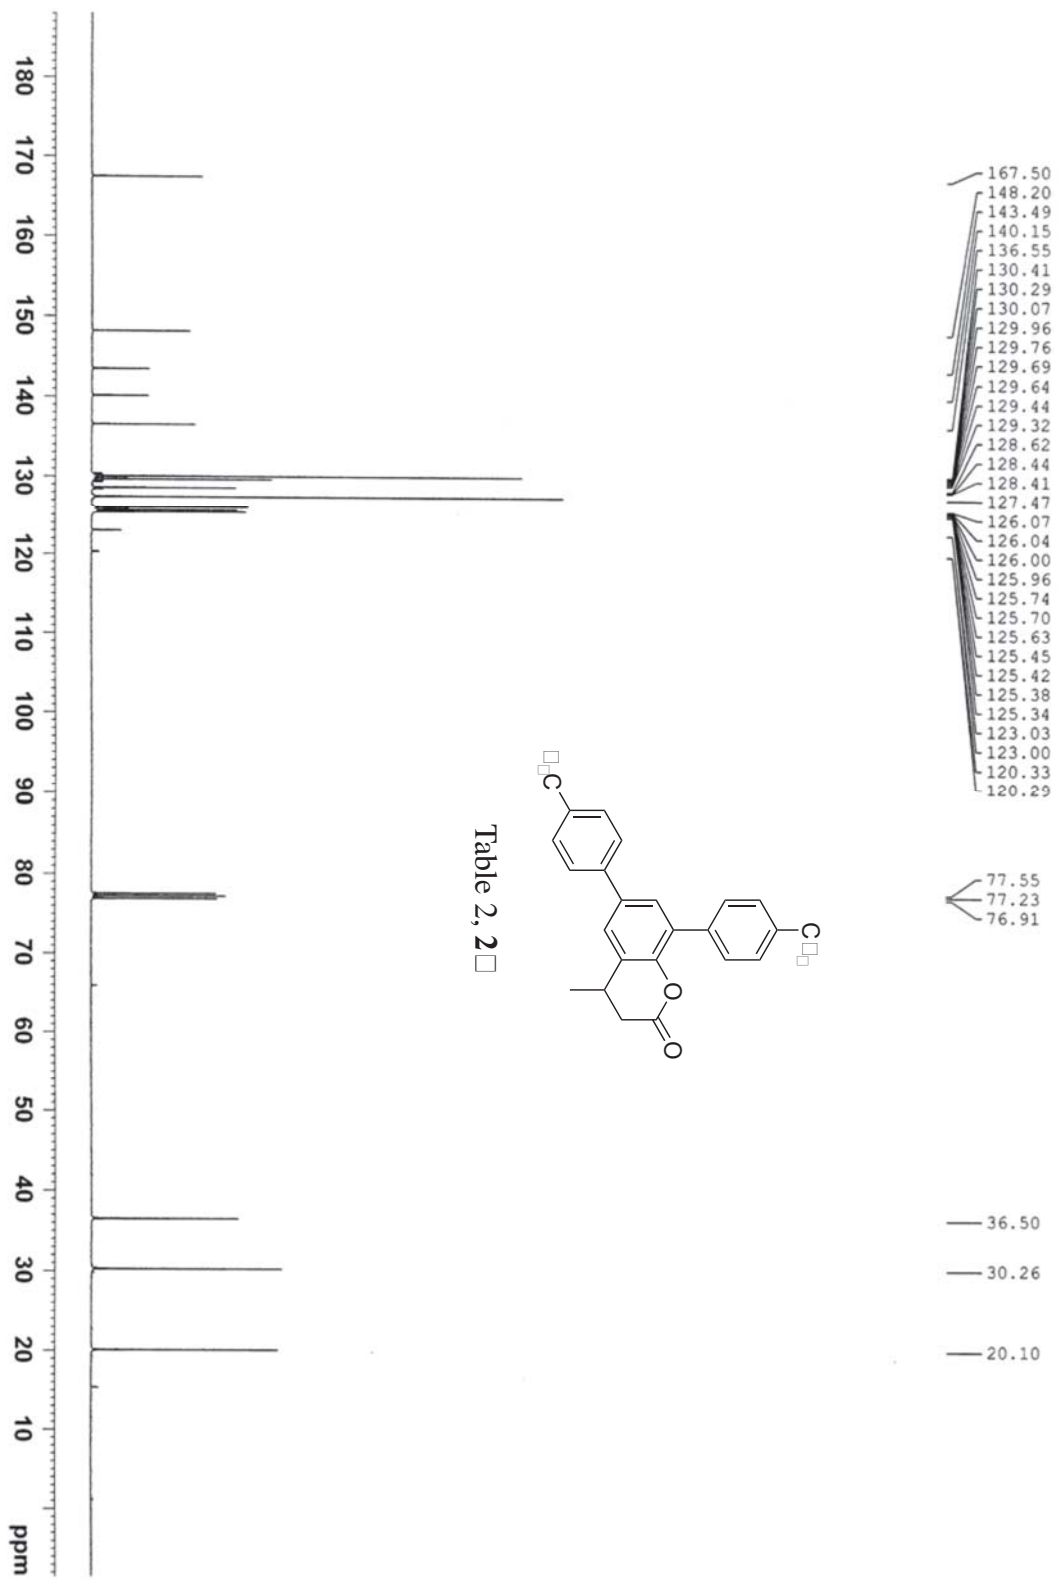

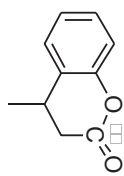

Scheme 2, 2a

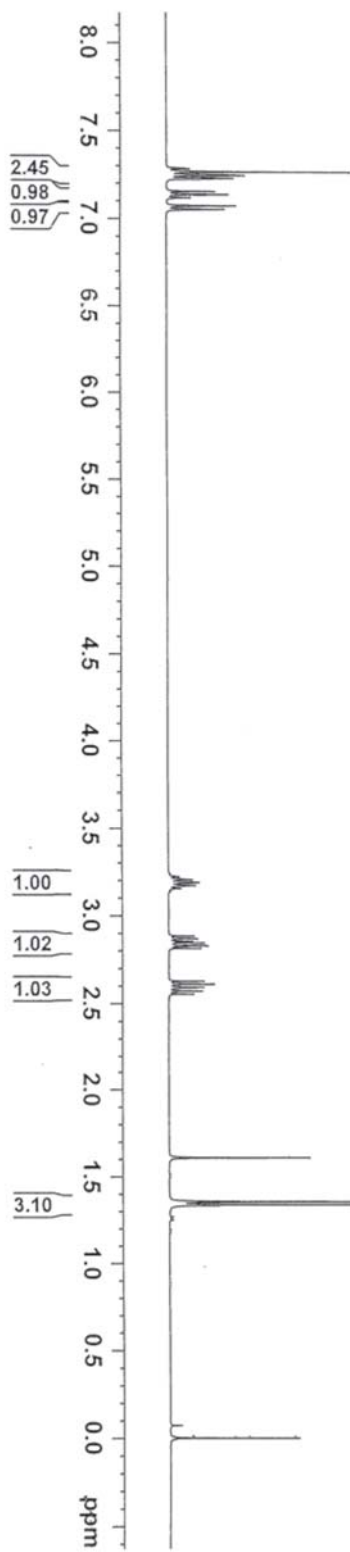

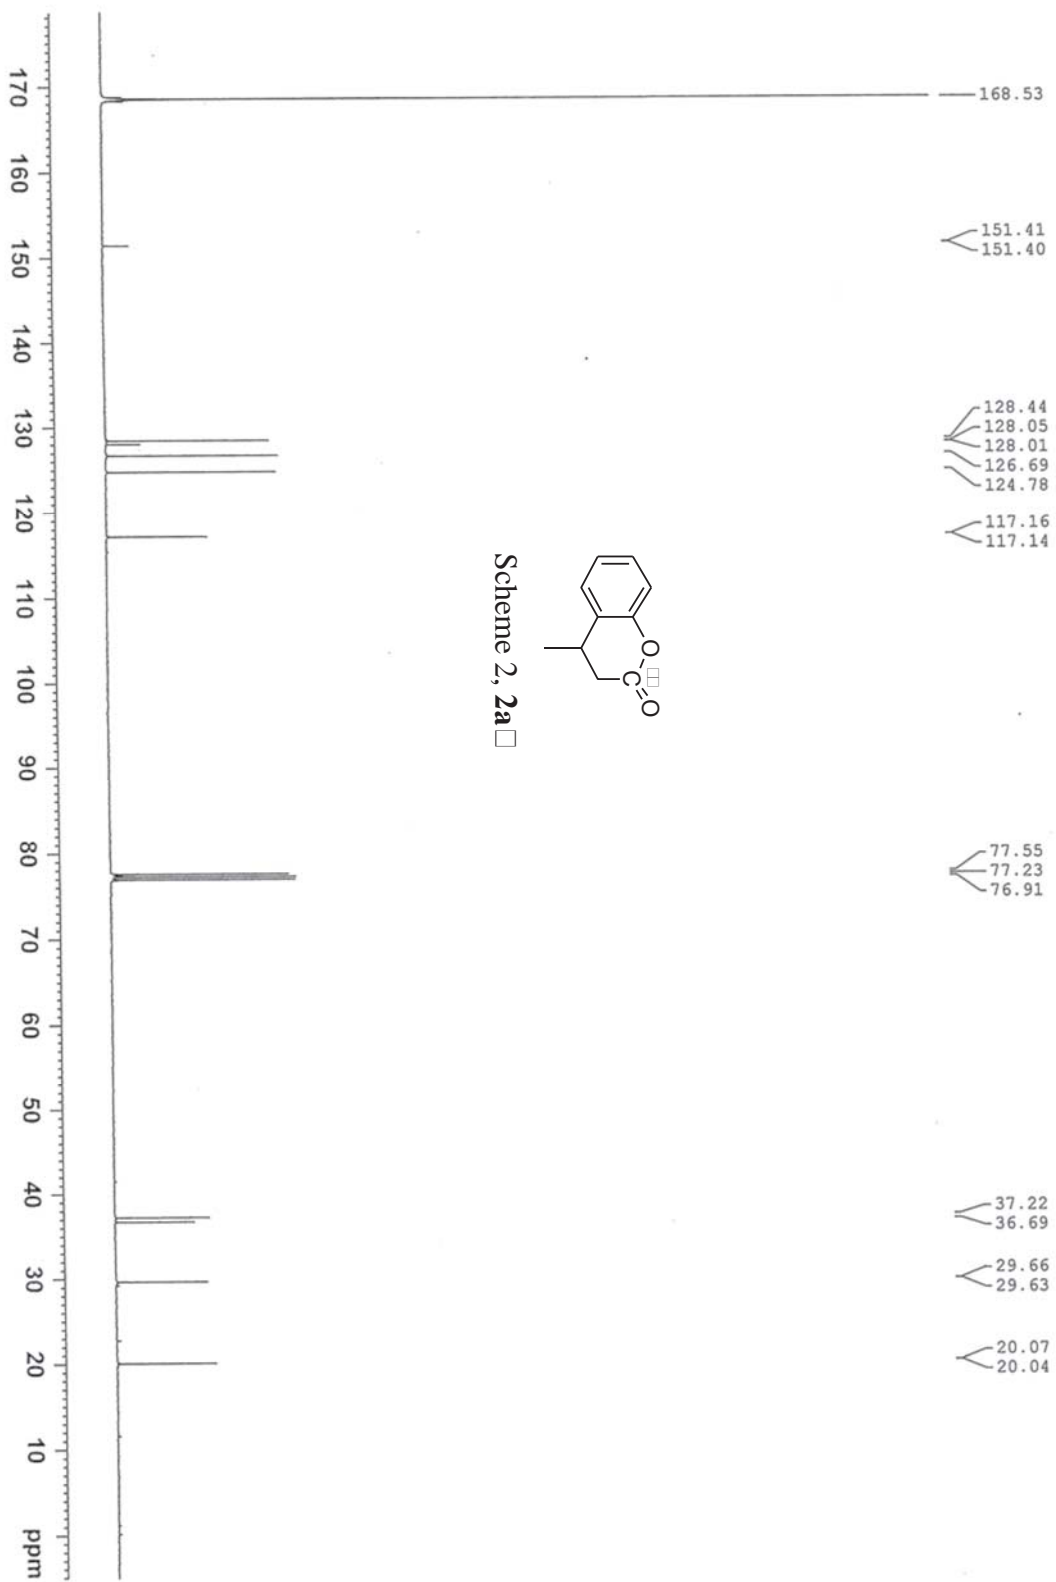

Supplement: c5ob01431j1.pdf [file c5ob01431j1.pdf]
